# Supplementary material
Source: publisher site journal article supplement (https://www.dovepress.com/article/427612)

**Supplementary Material 1**: CCK-8 cell activity analysis of hair papilla cells at different concentrations of minoxidil. Columns labelled *p < 0.05 show a statistically significant difference between this minoxidil concentration and a minoxidil concentration of 0 mmol/L. NS p > 0.05 show that there is no statistically significant difference between the concentration of this minoxidil and a minoxidil concentration of 0 mmol/L


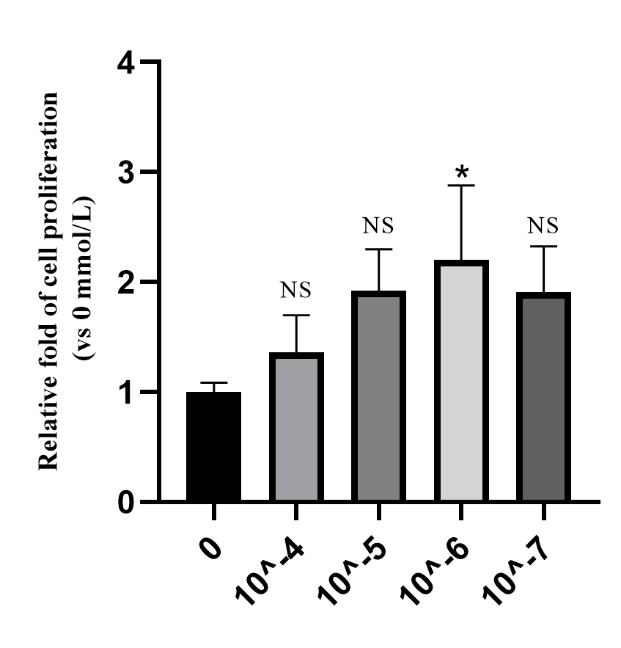


**Supplementary Material 2**: Molecular docking results for a total of 22 putative potential targets of minoxidil

ESR1 -18.654501


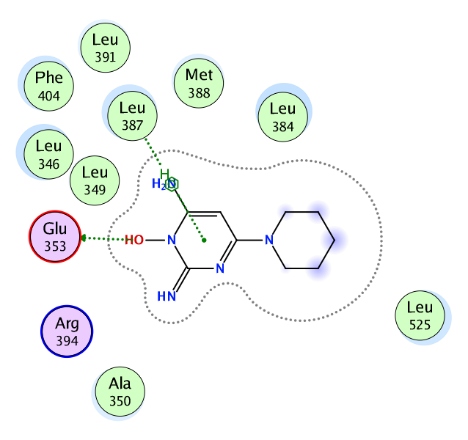

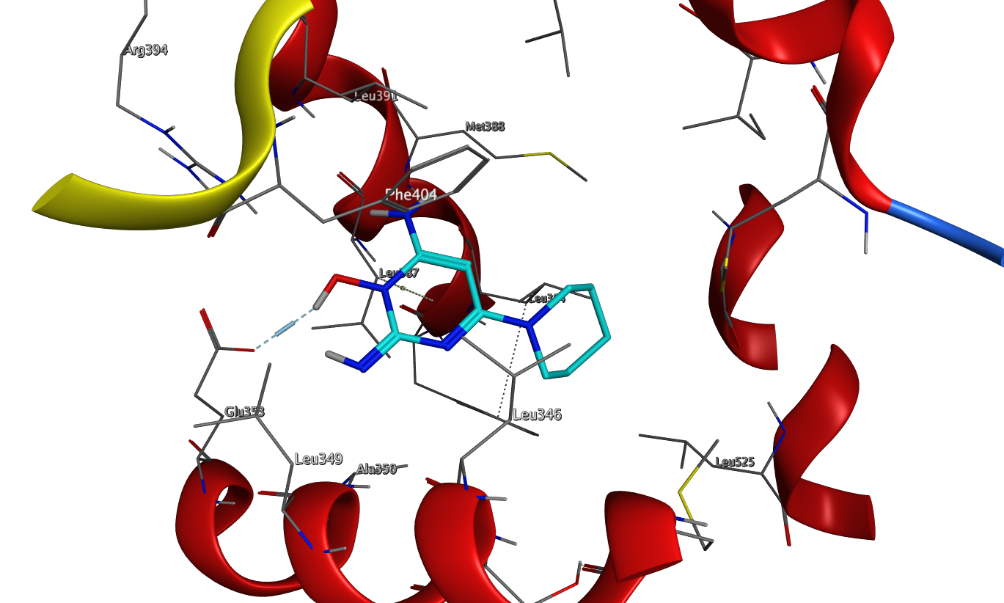


HSP90AA1 -17.0391369


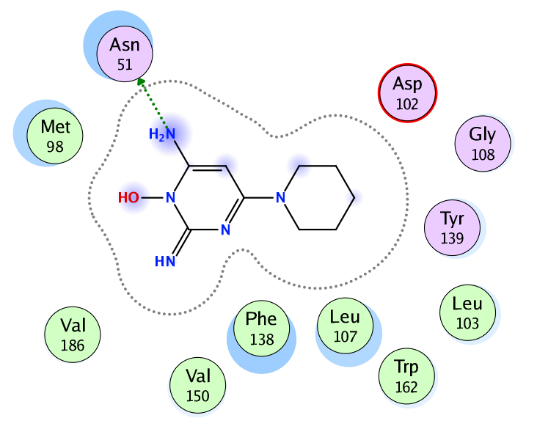

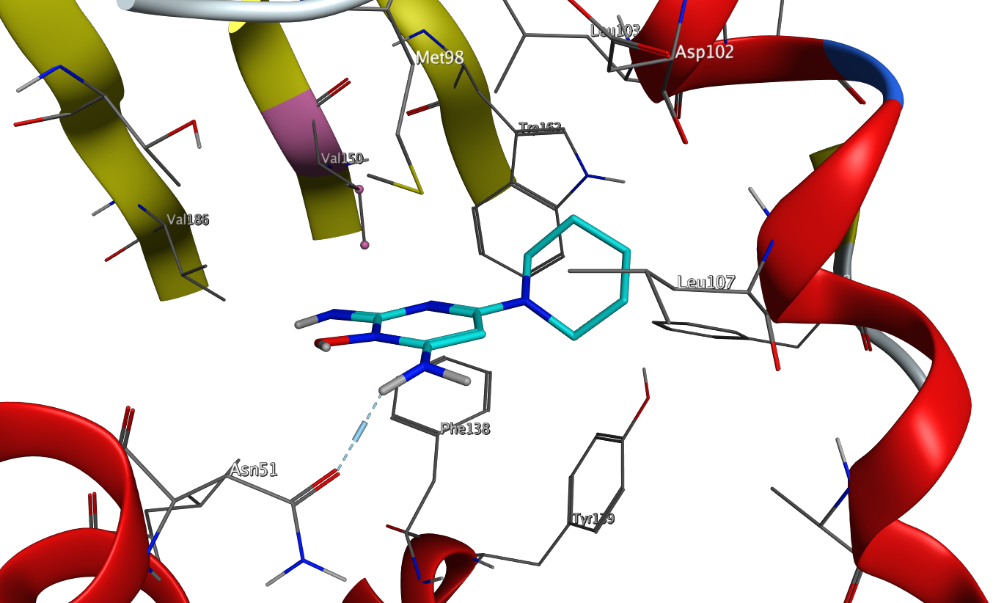


IL-6 -9.1814785


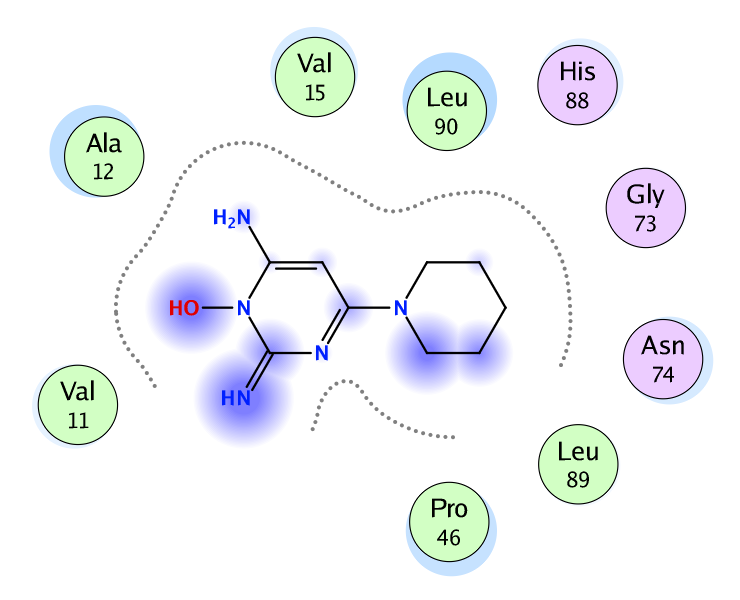

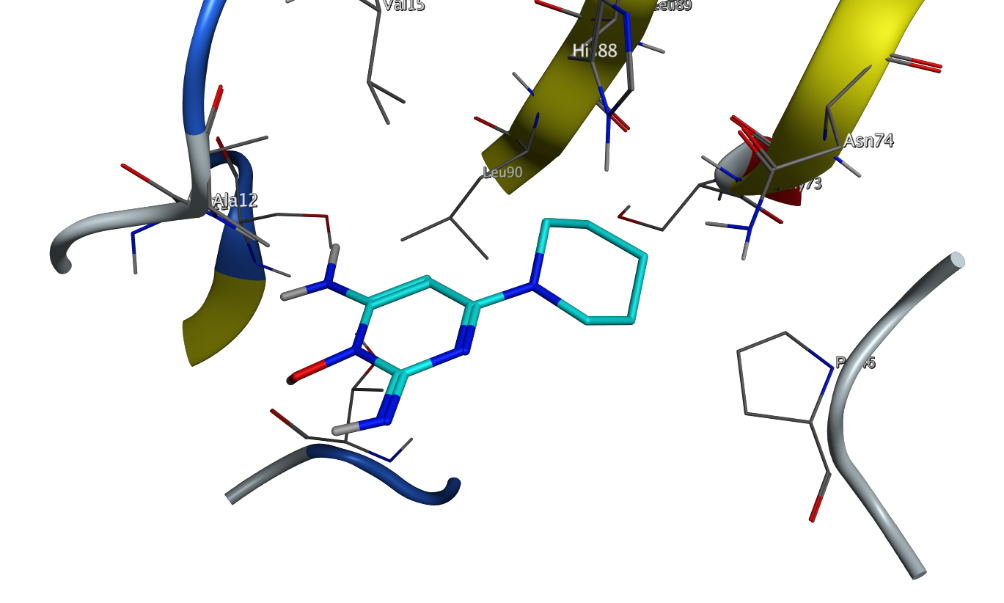


JUN -3.99837065


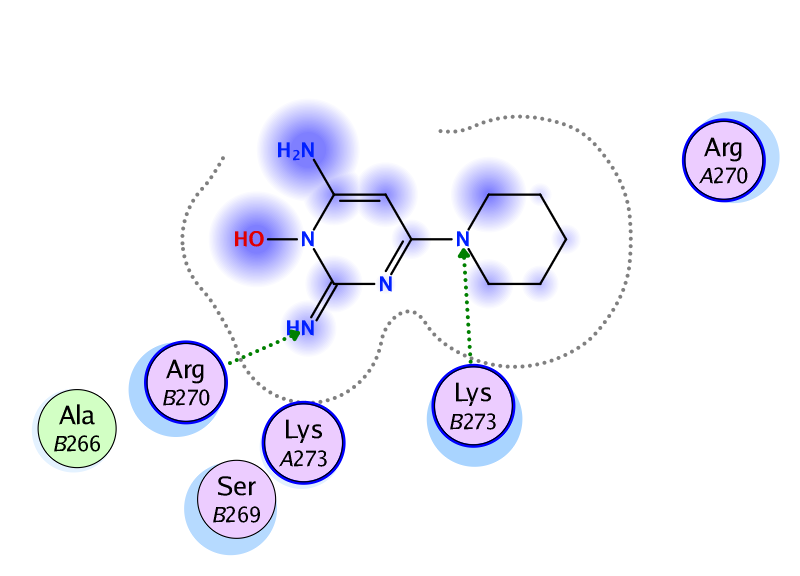

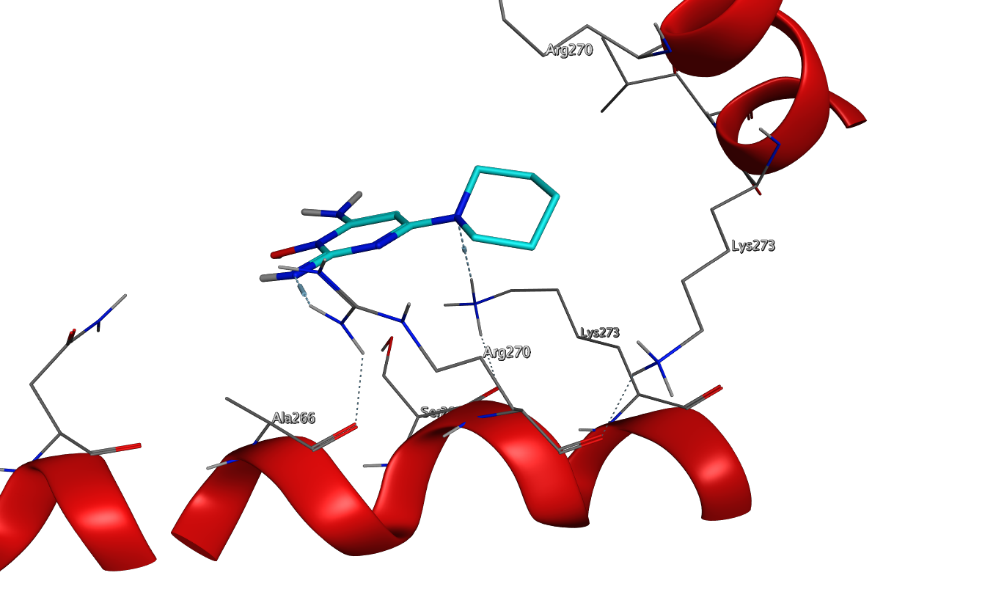


MAPK3 -16.5516014


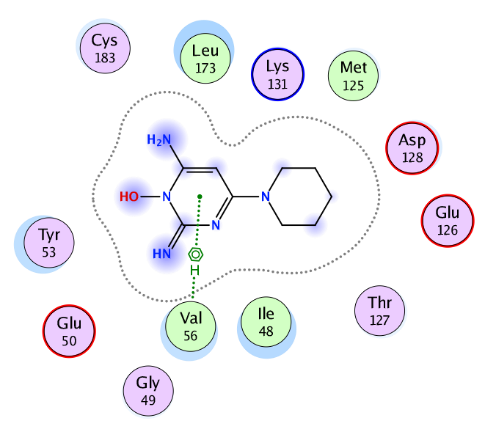

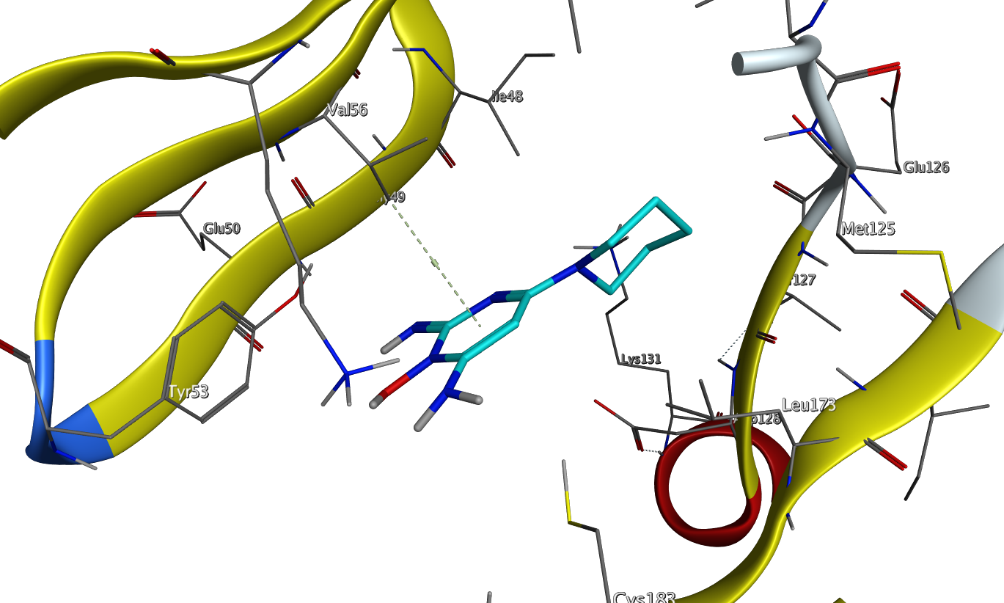


STAT3 -9.83061028


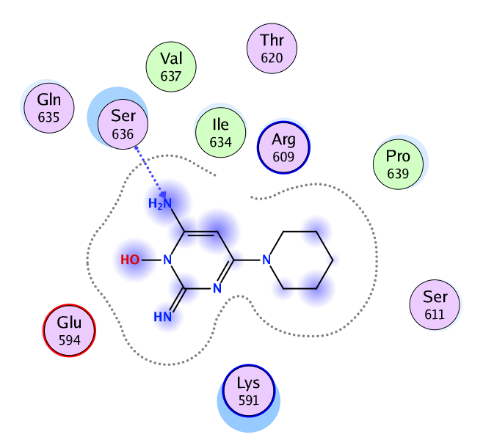

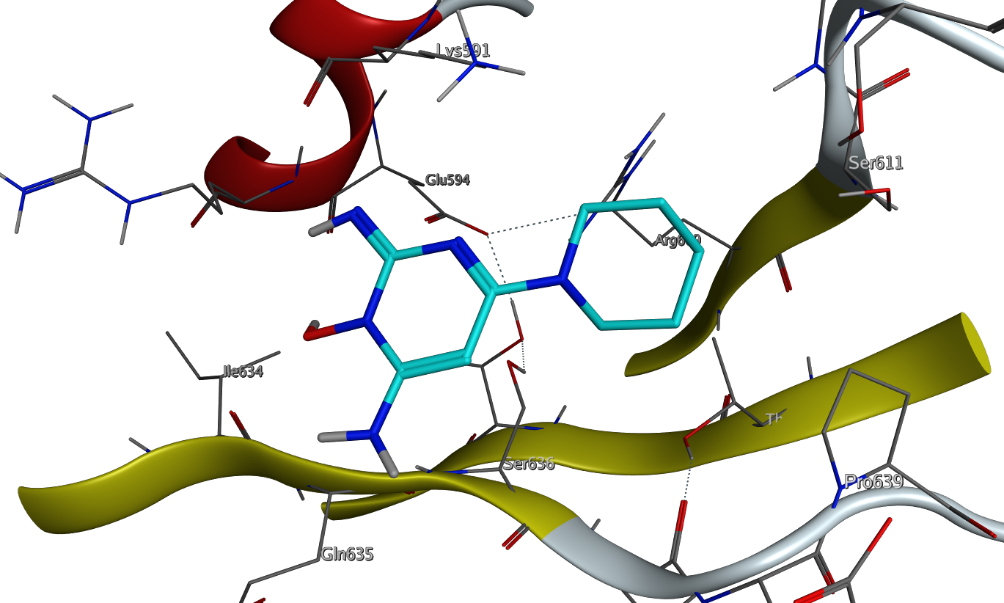


ATK1-3cqw -10.1968555


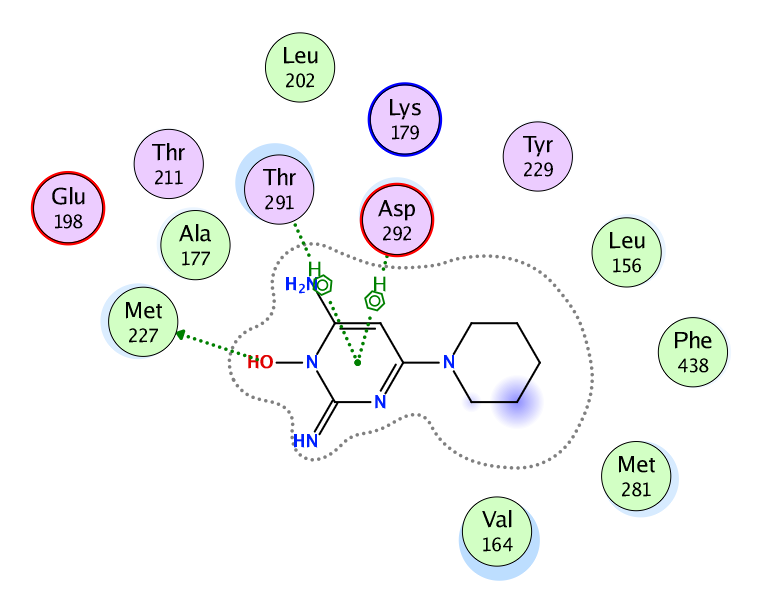

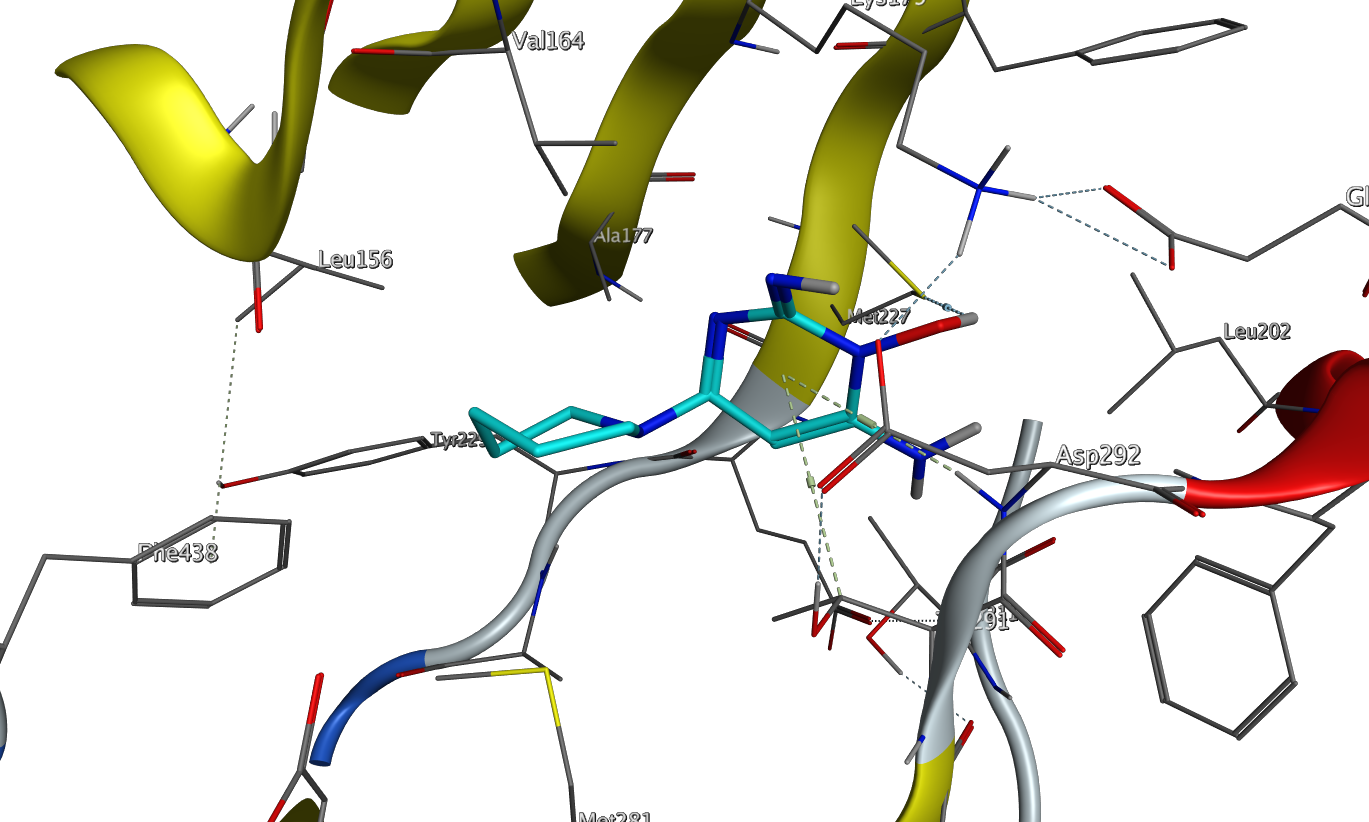


EGFR-7lgs -13.2886705


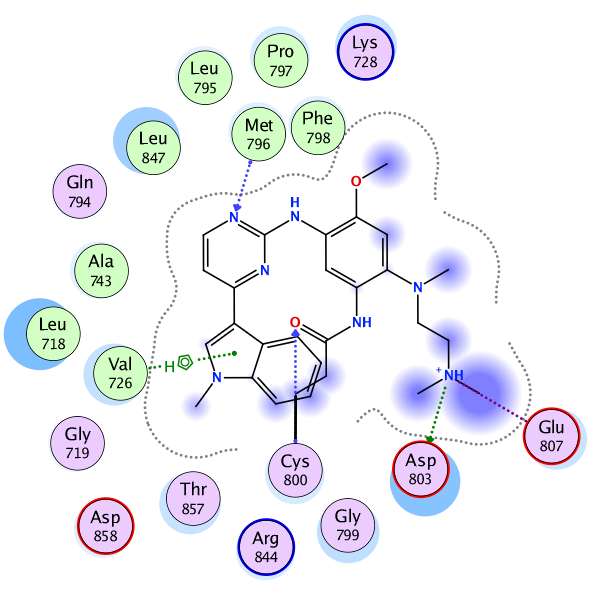

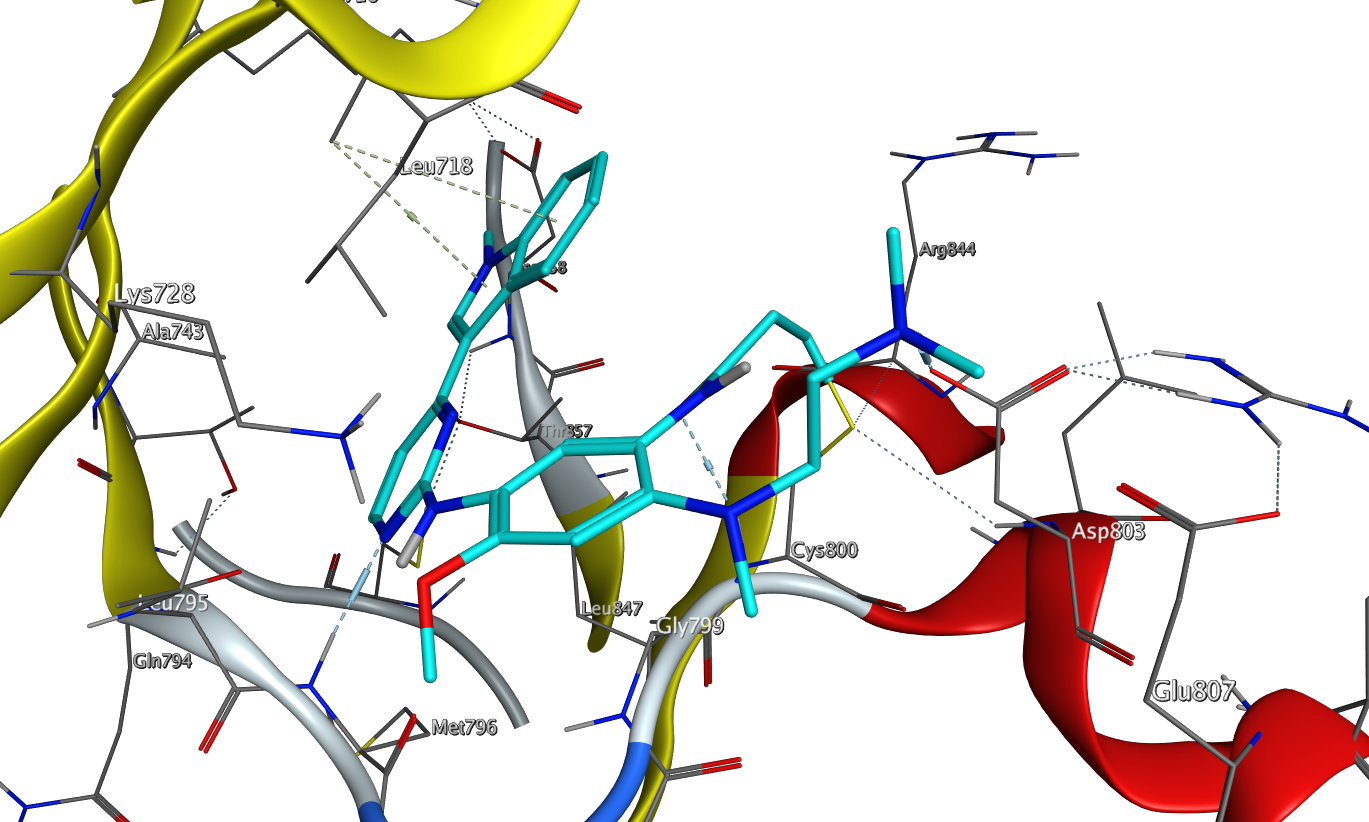


SRC-3el8 -15.6900711


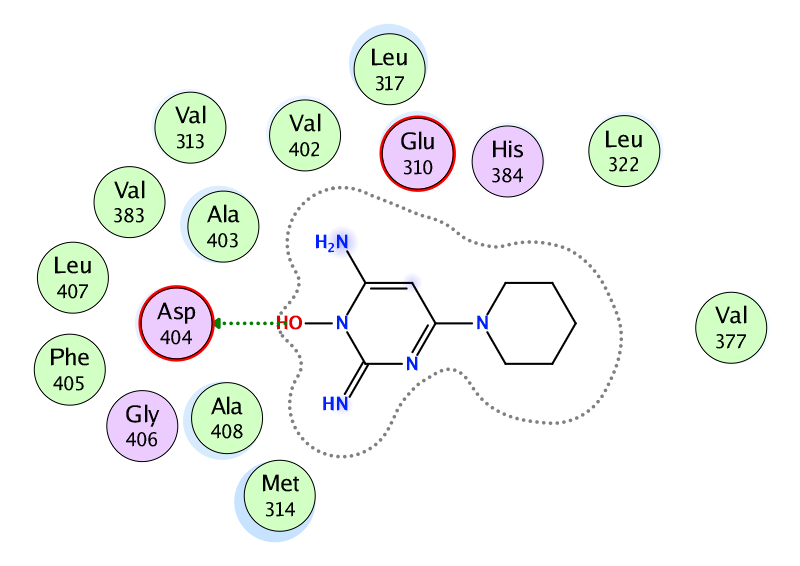

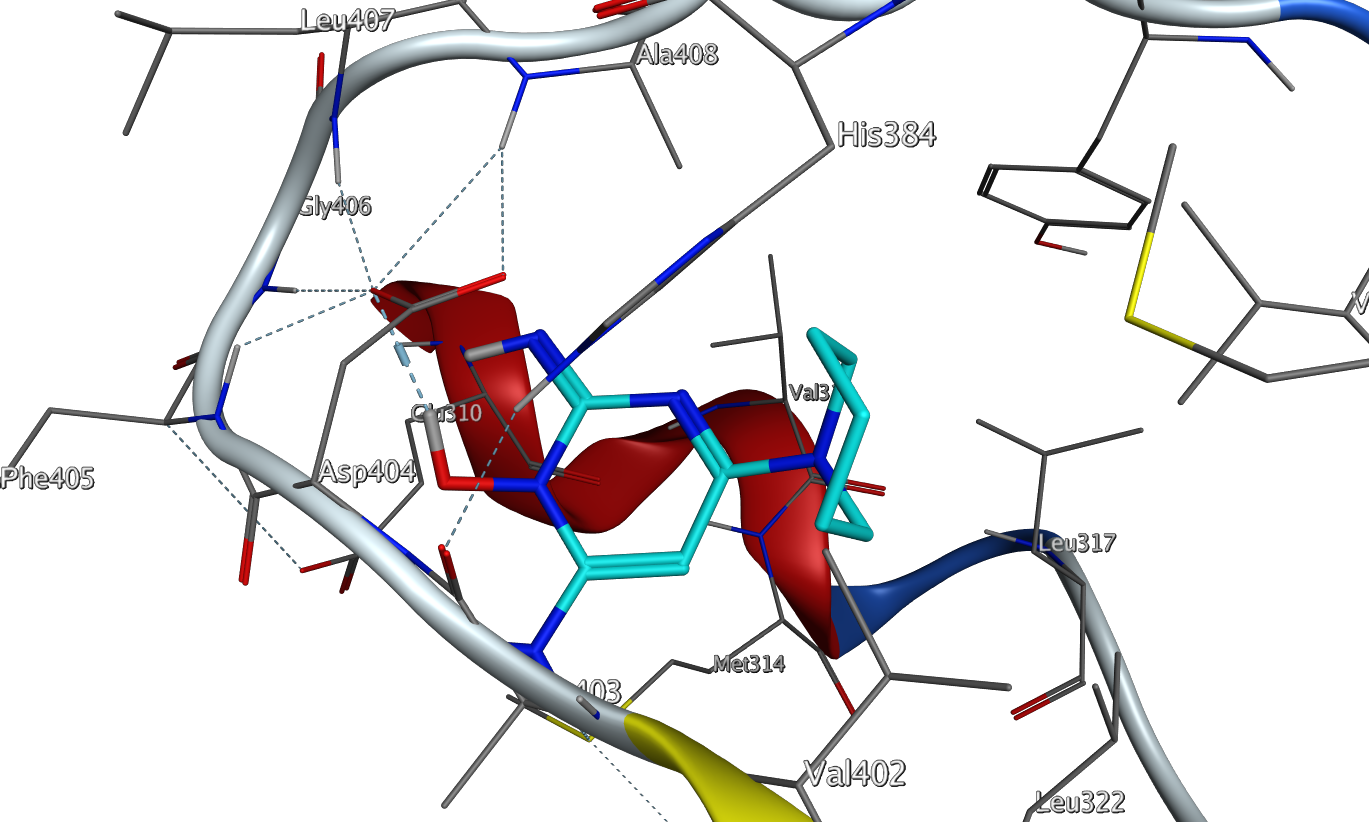


TYMS-1hvy -16.0795059


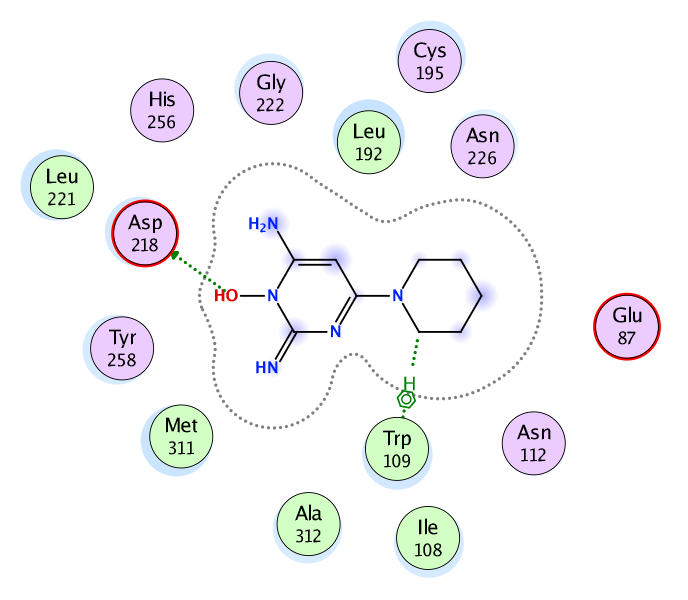

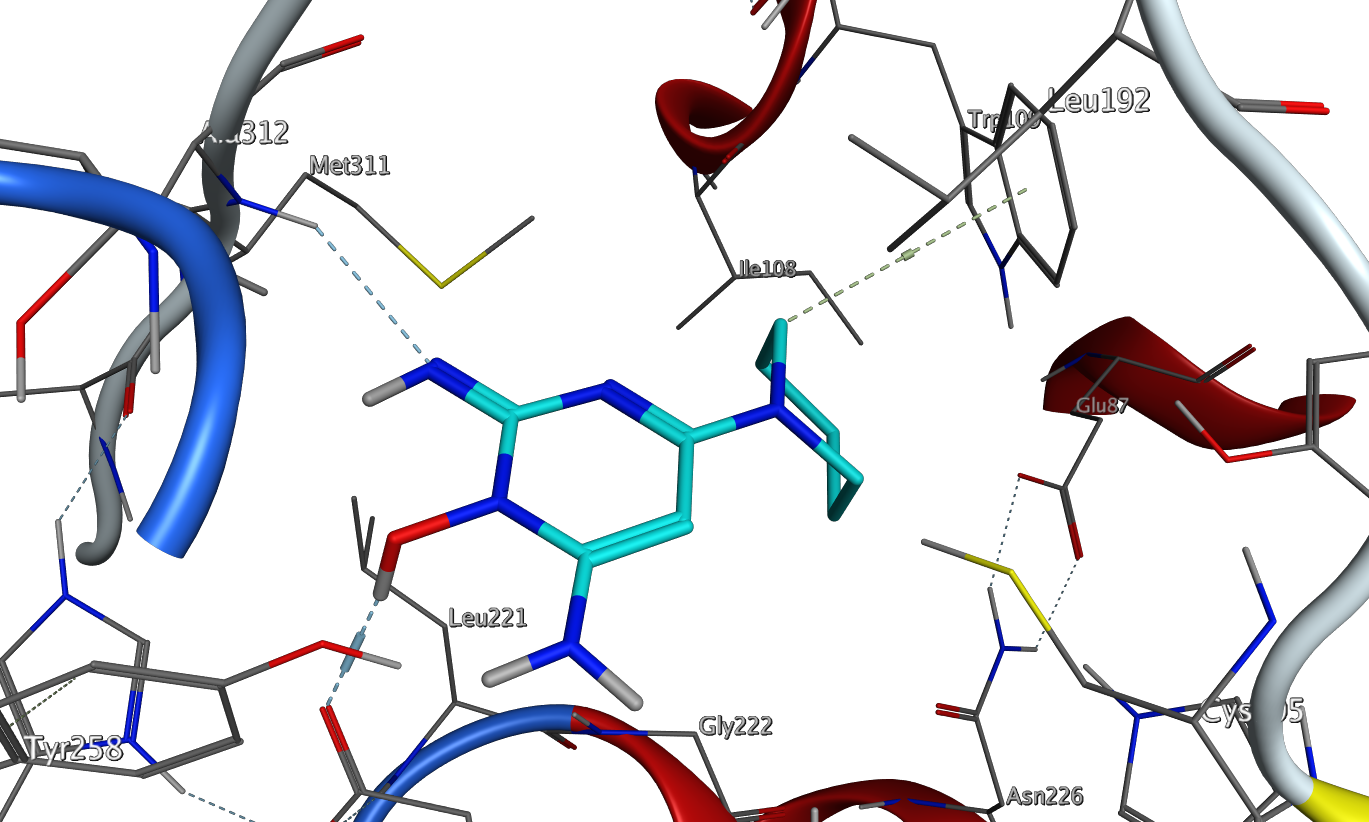


NR3C2-1y9r -17.0333767


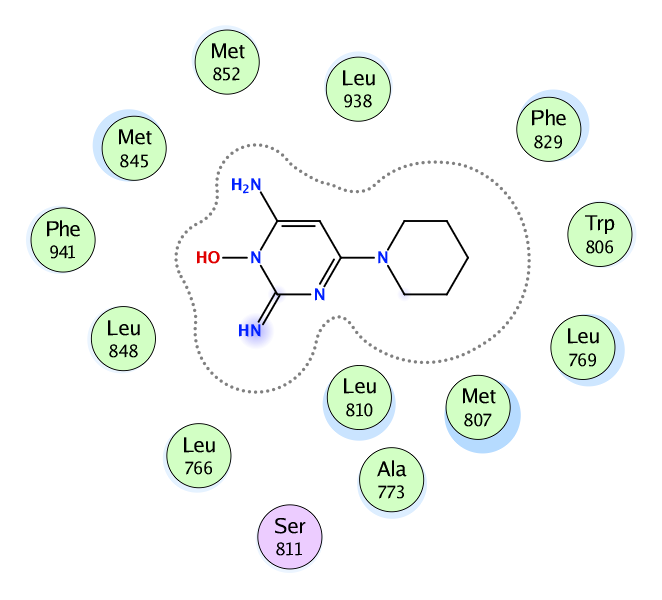

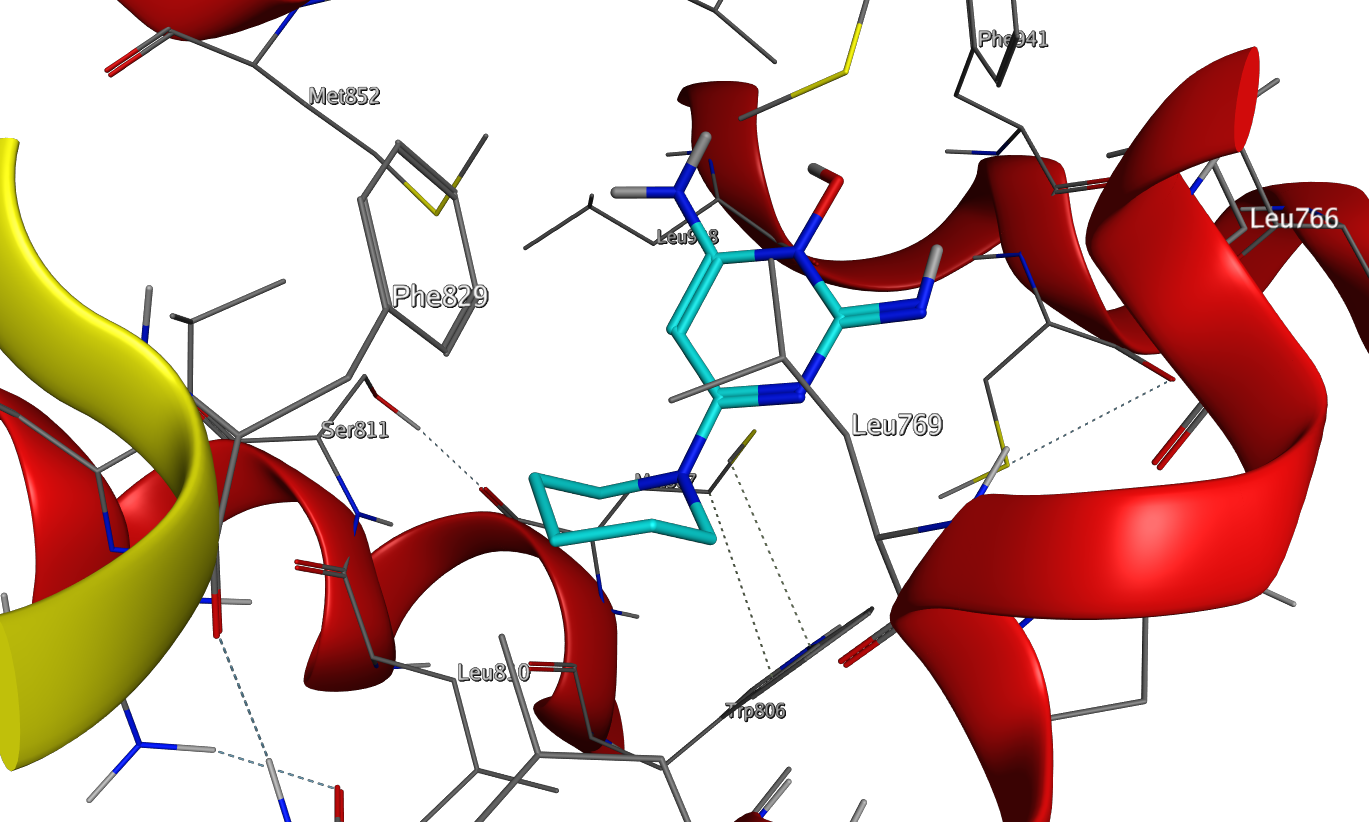


CYP19A1-3eqm -14.3199024


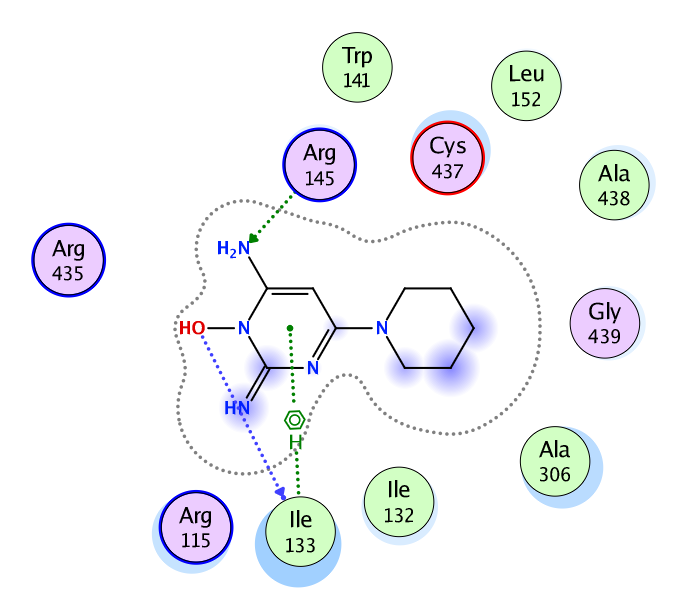

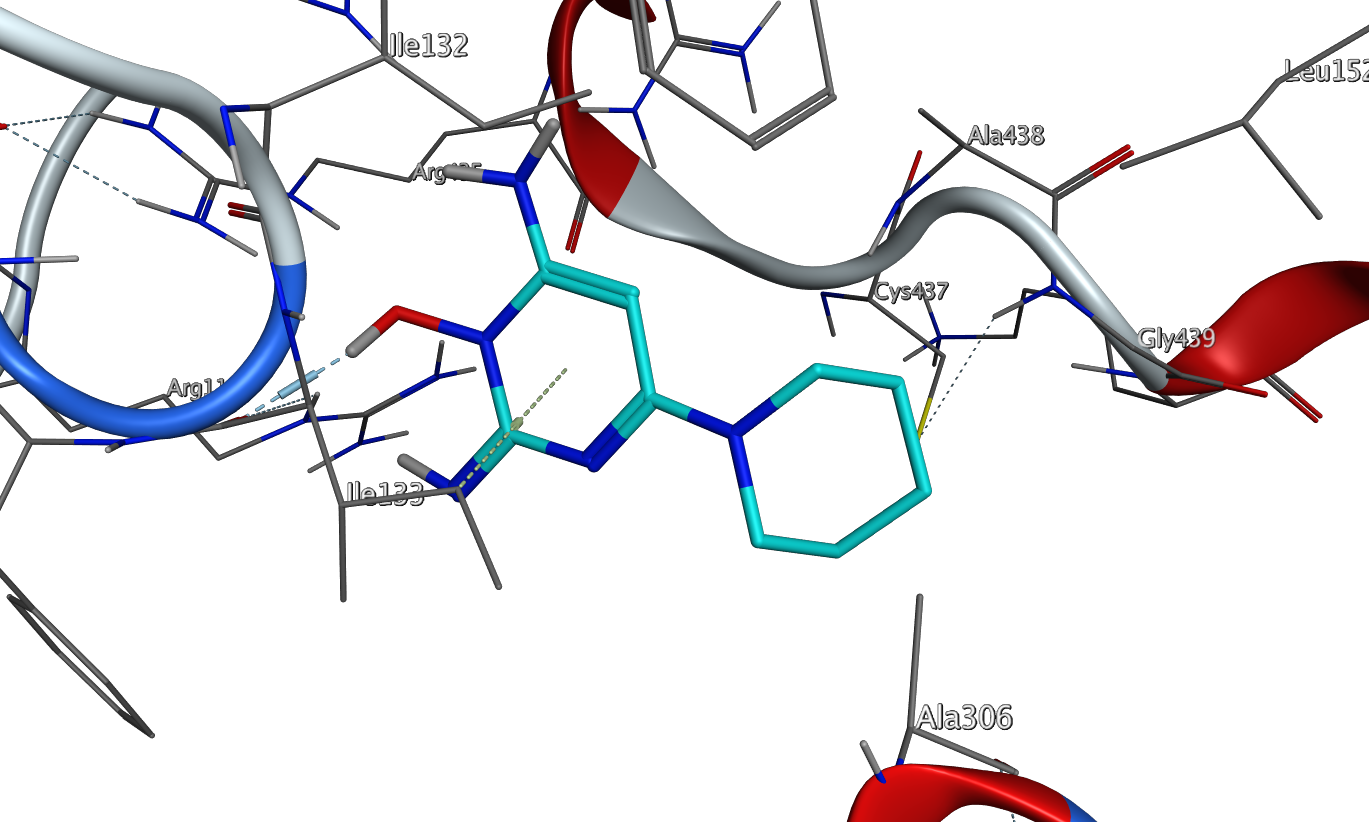


CYP17A1-3ruk -18.2274761


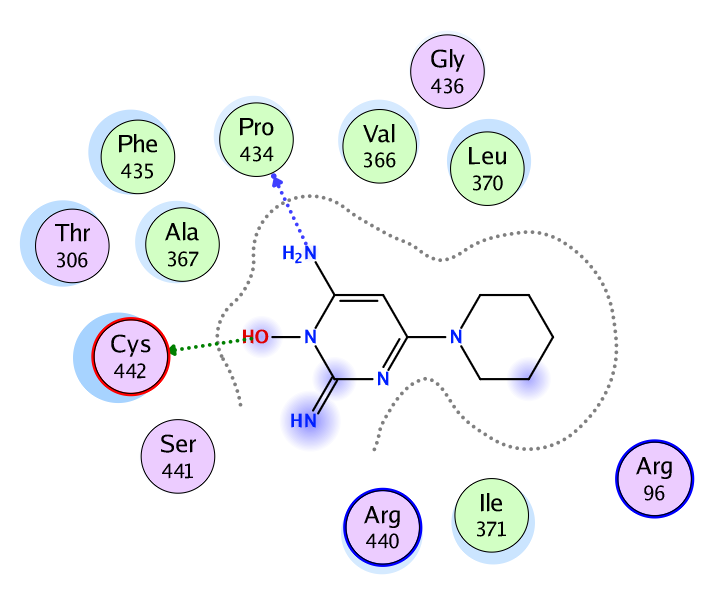

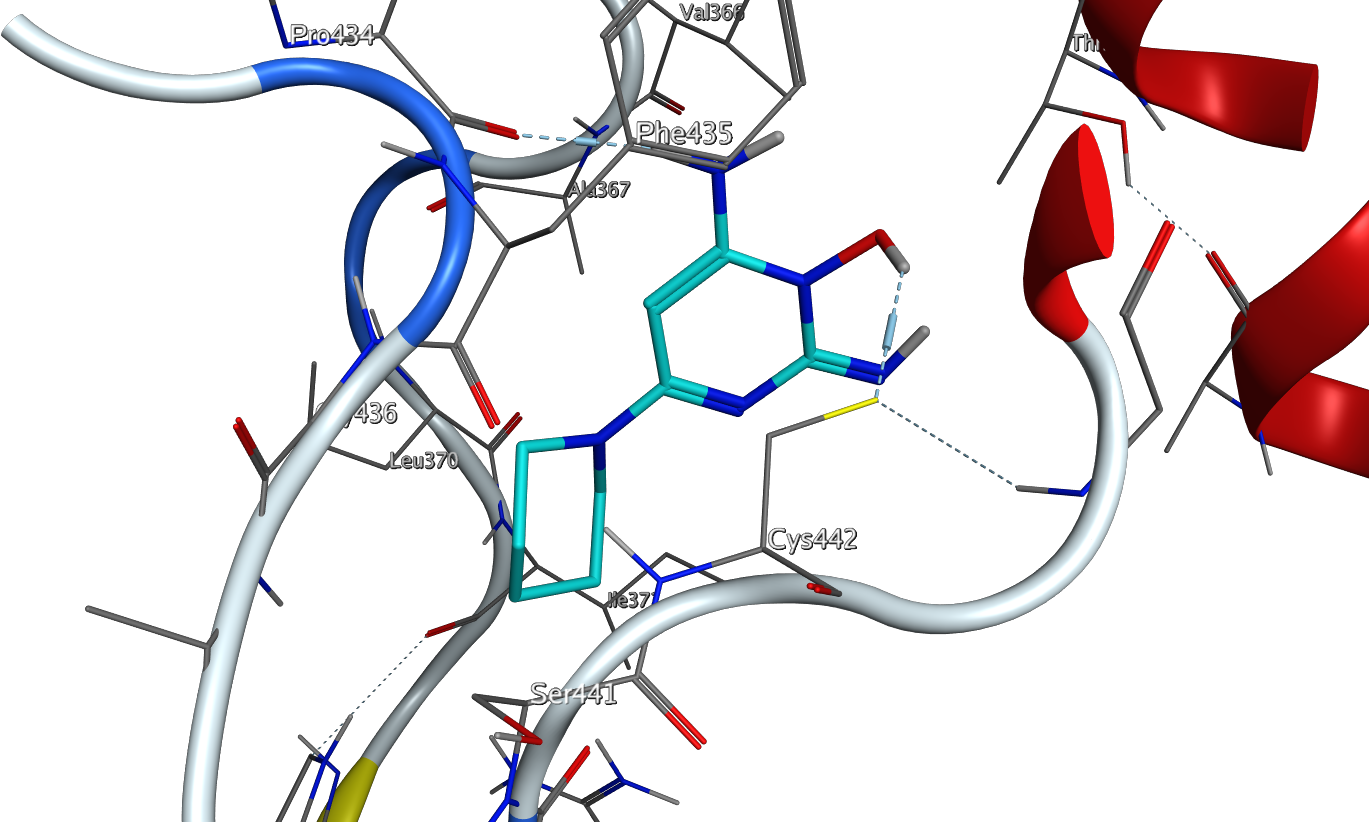


CCR5-4mbs -19.6593513


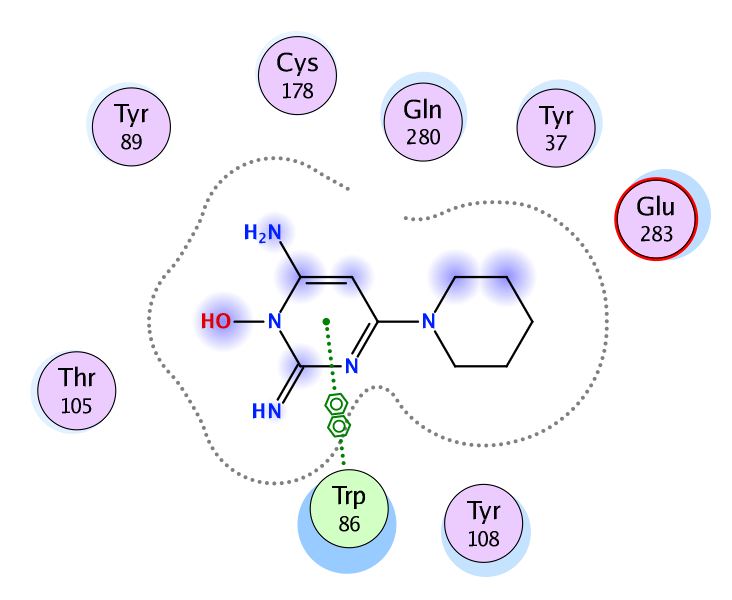

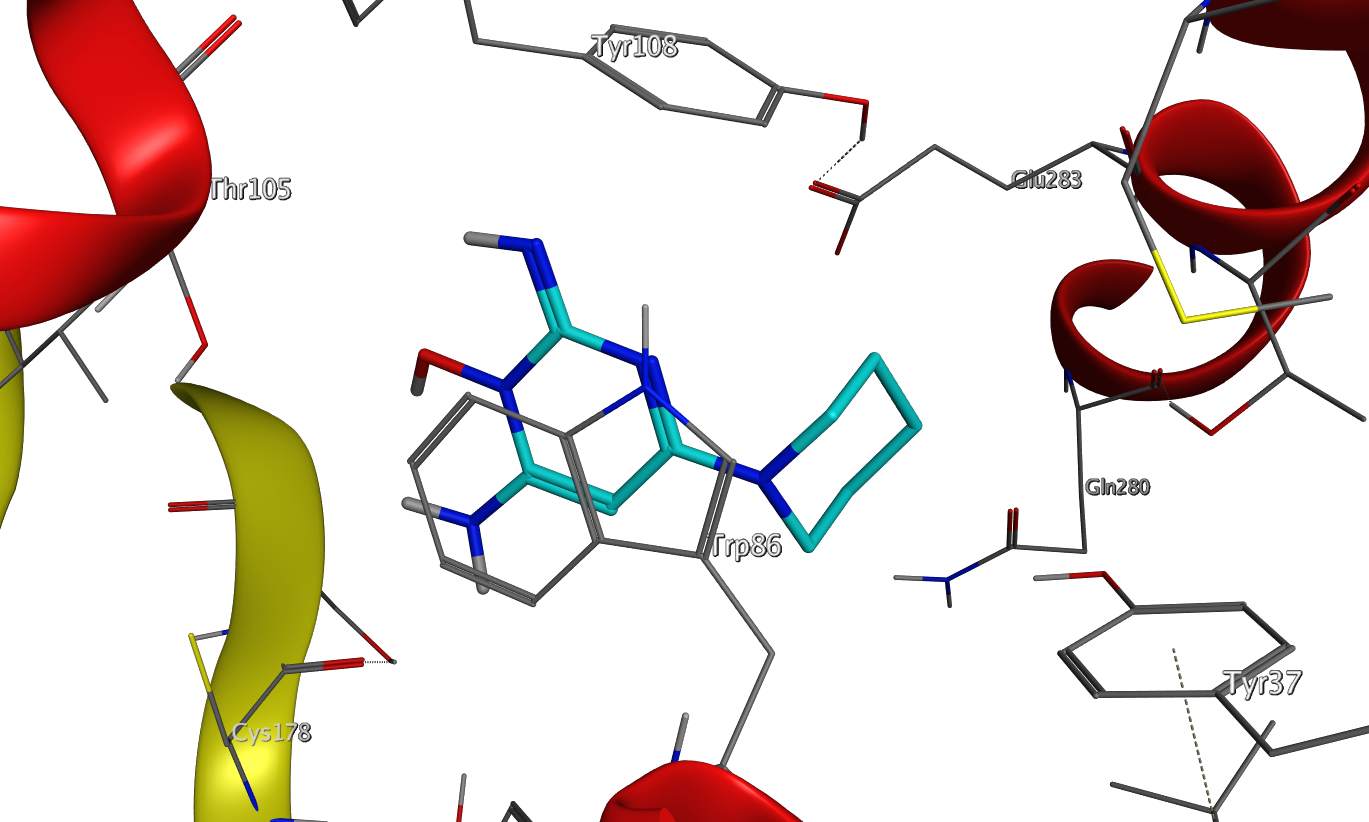


AR-1e3g -21.6506748


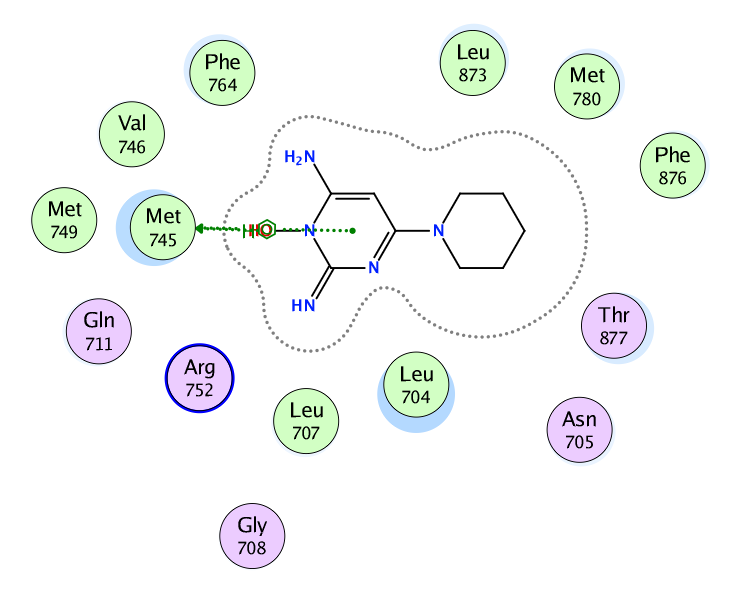

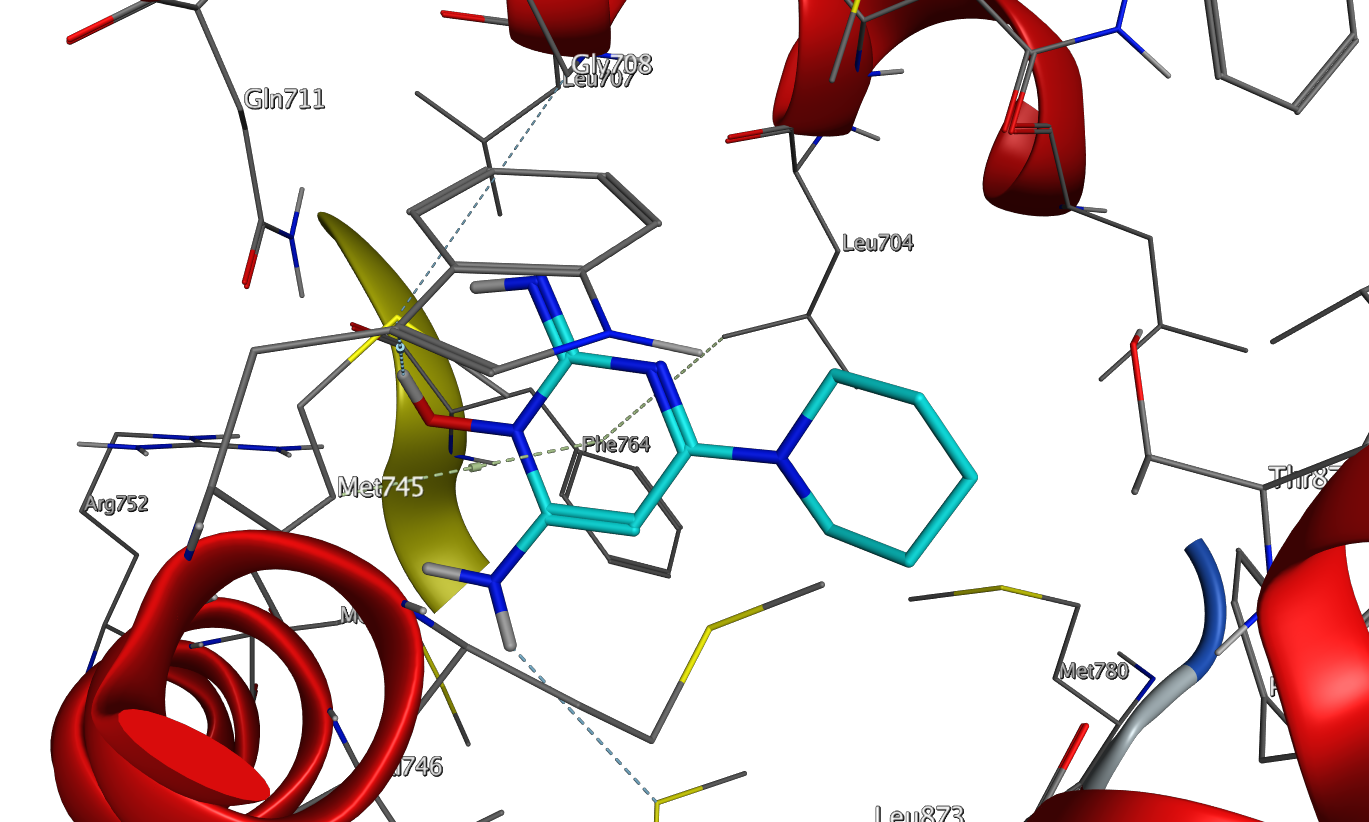


UBC-1c3t -9.20133686


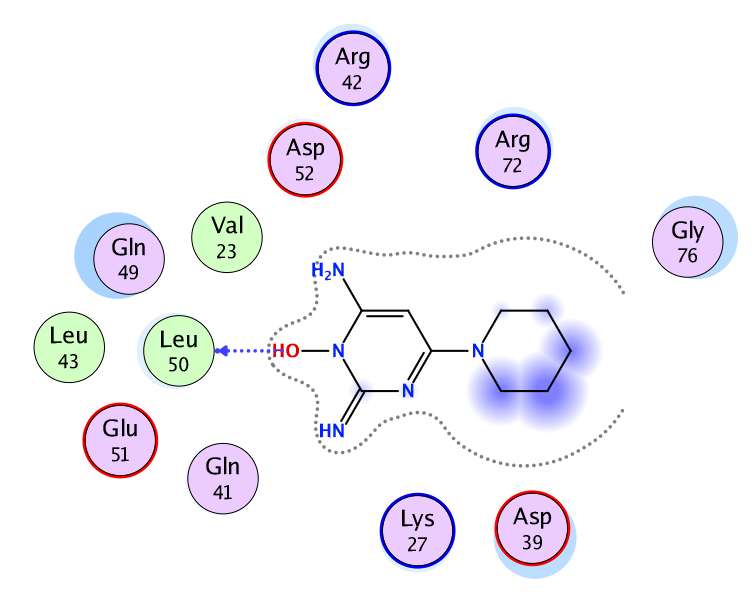

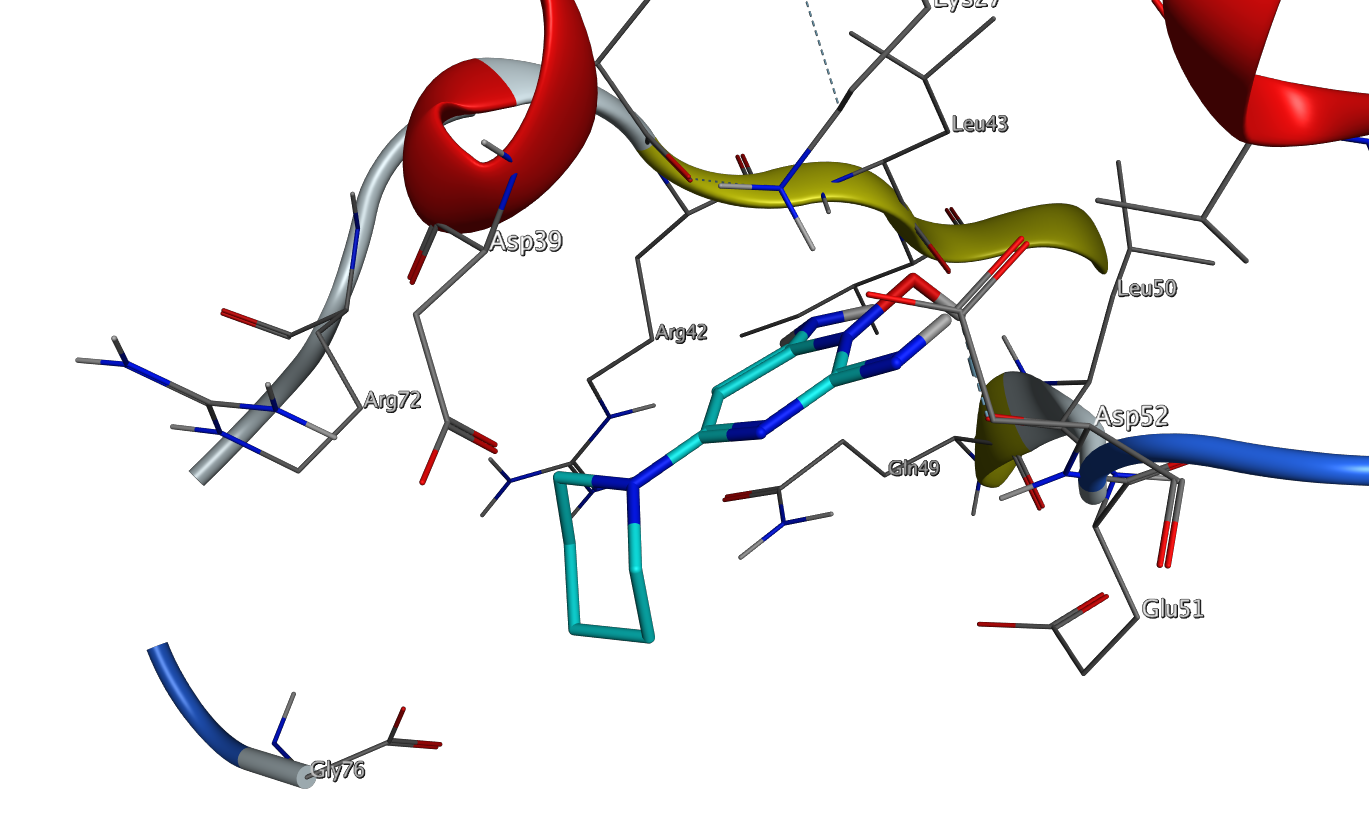


BRCA1-1jnx -1.99599433


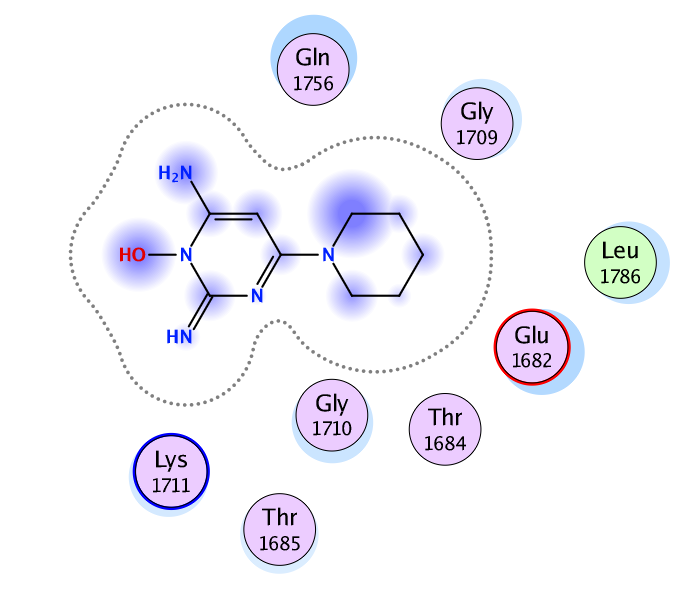

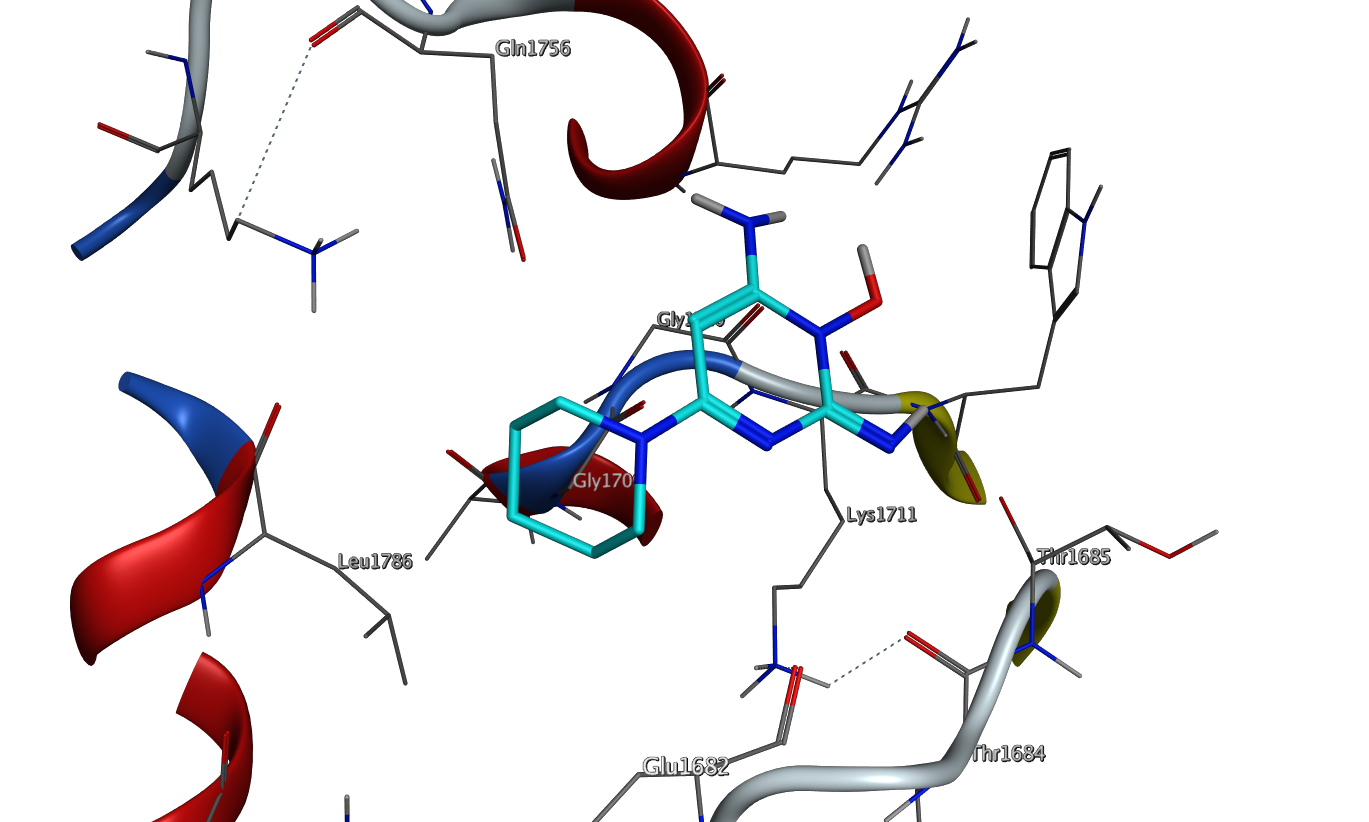


CTNNB1-1g3j -7.81384611


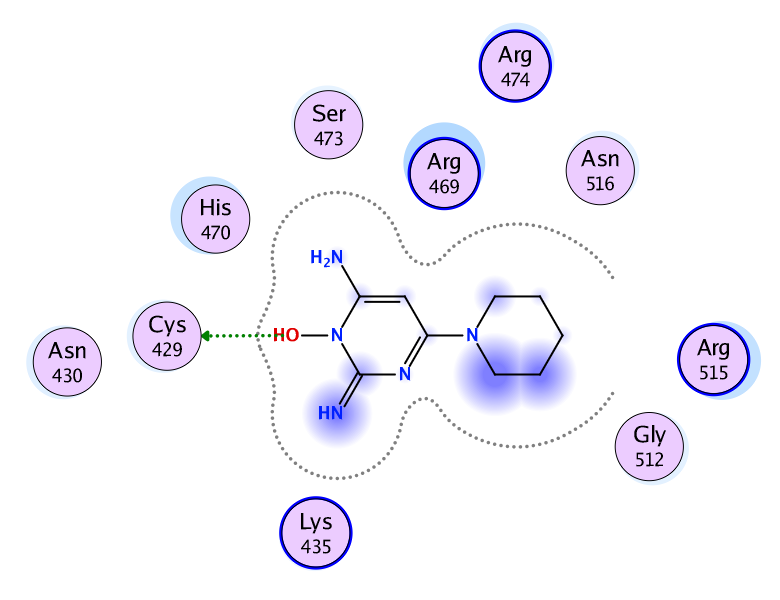

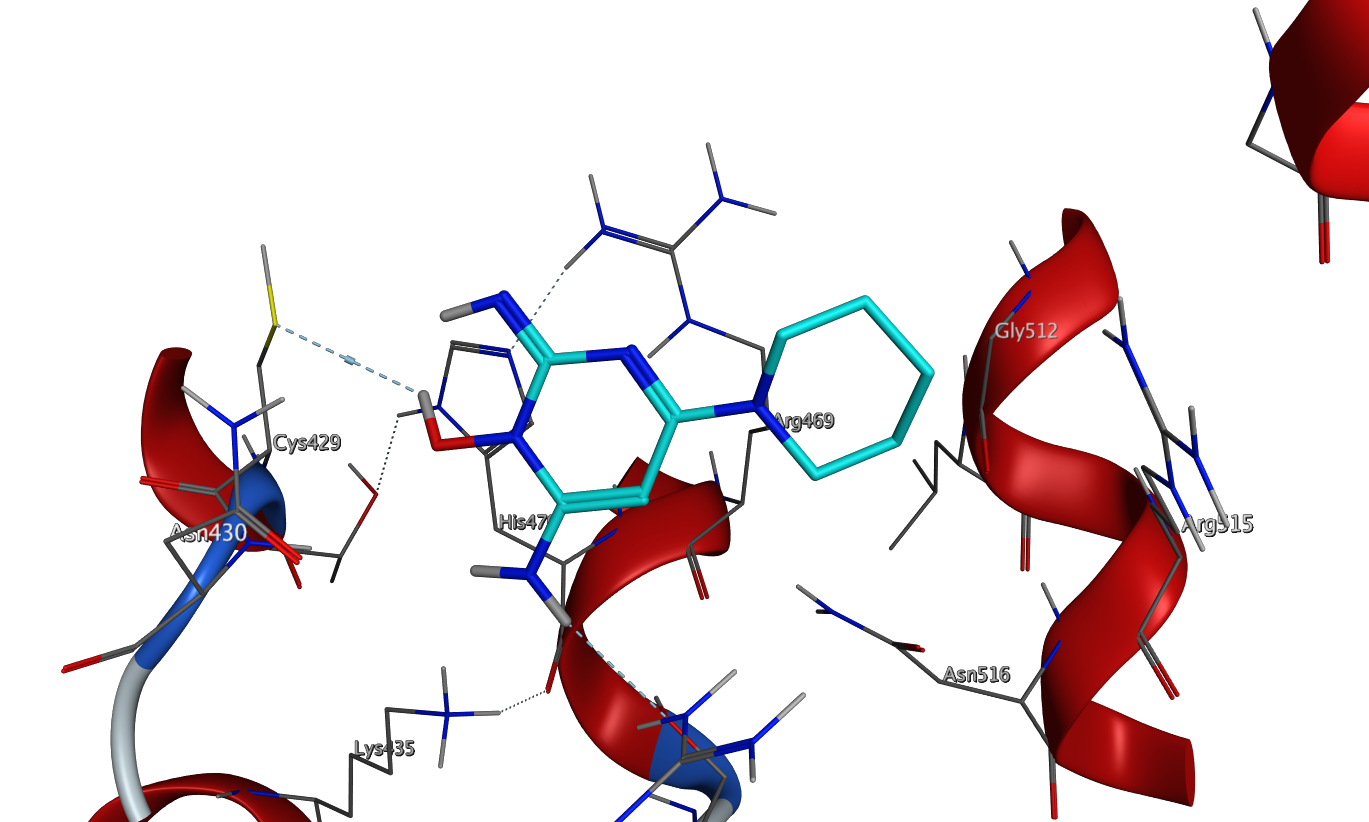


CAV1-model_v1 -6.85910368


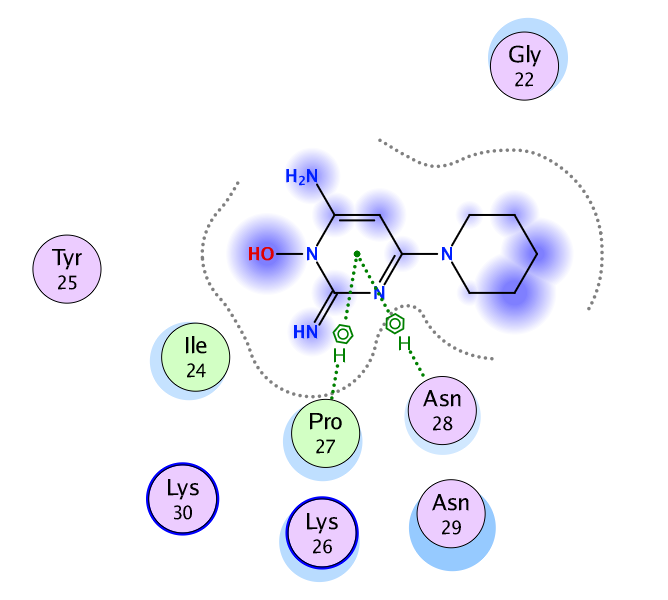

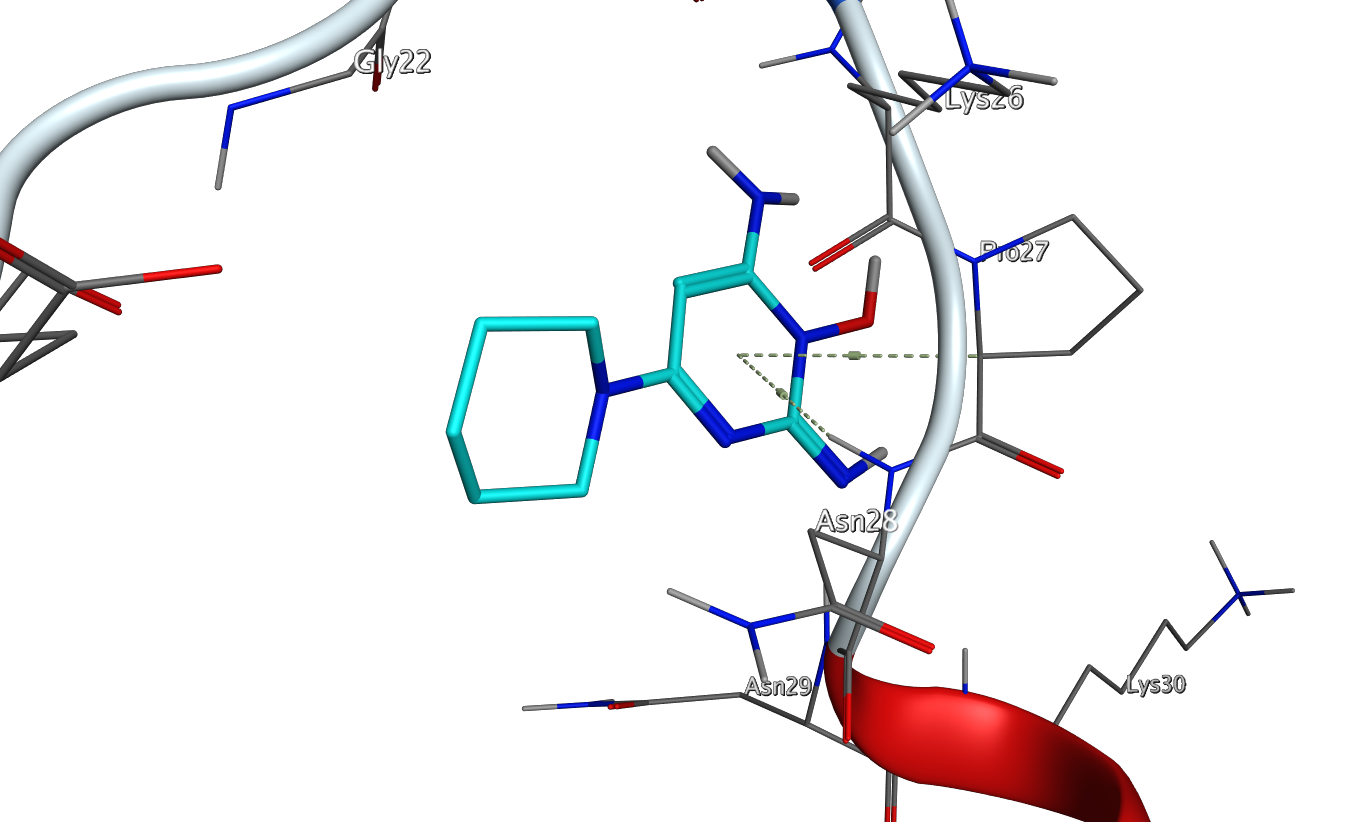


IGF1R-1jqh -12.7226181


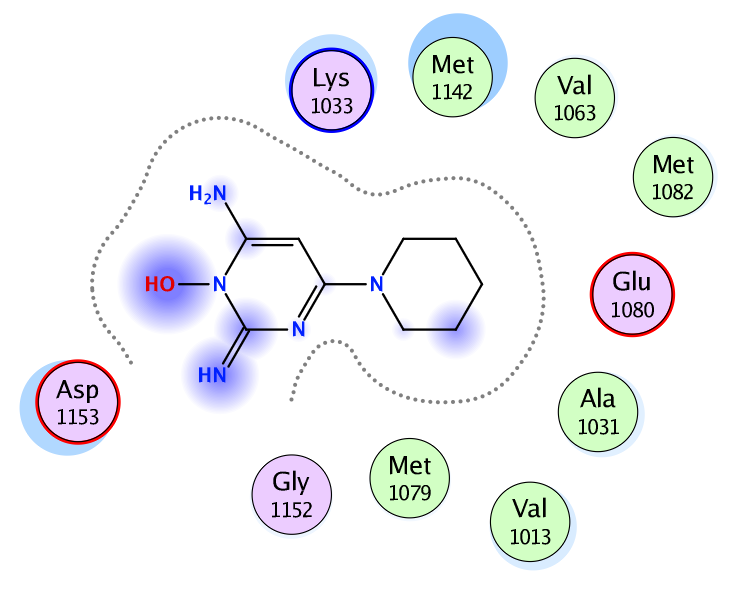

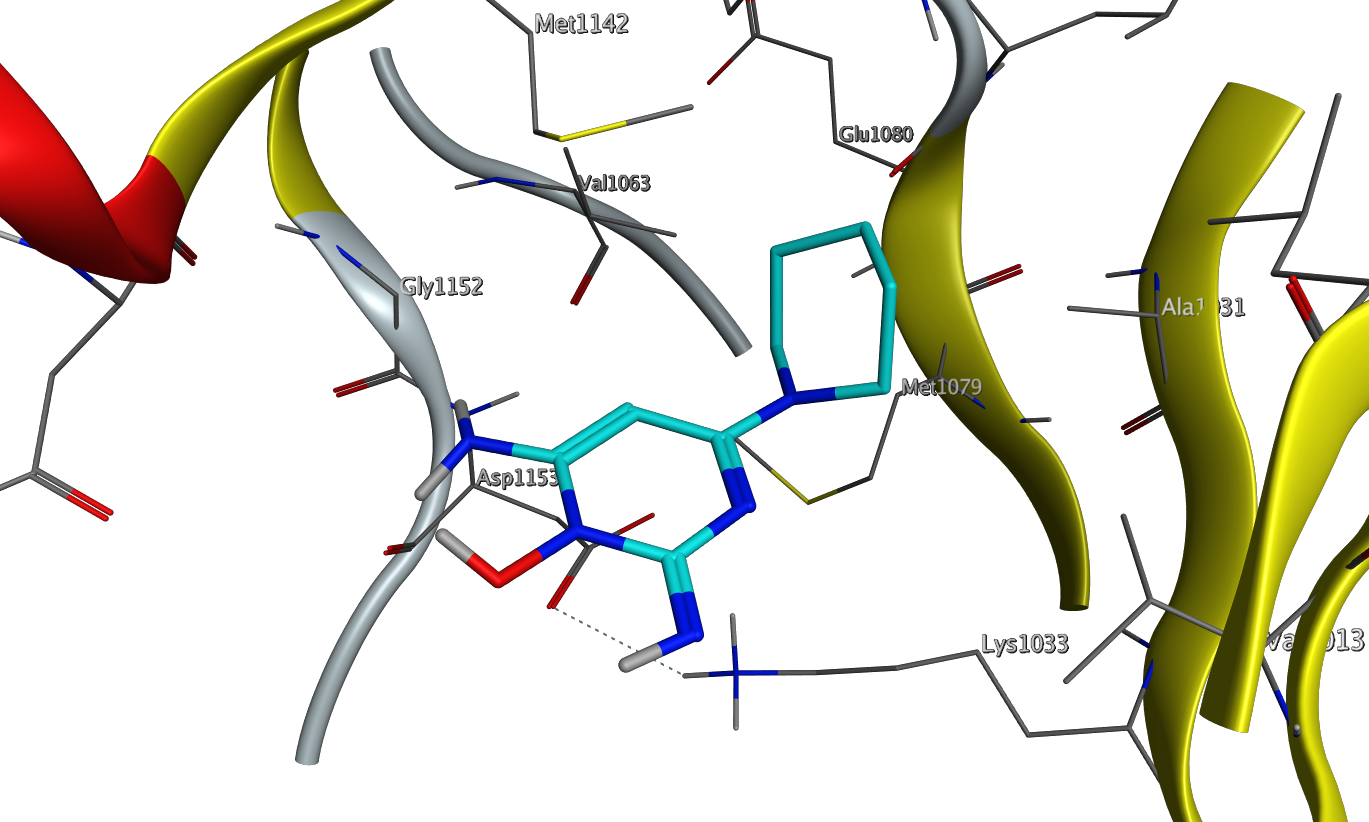


AKT1-1h10 -8.82464123


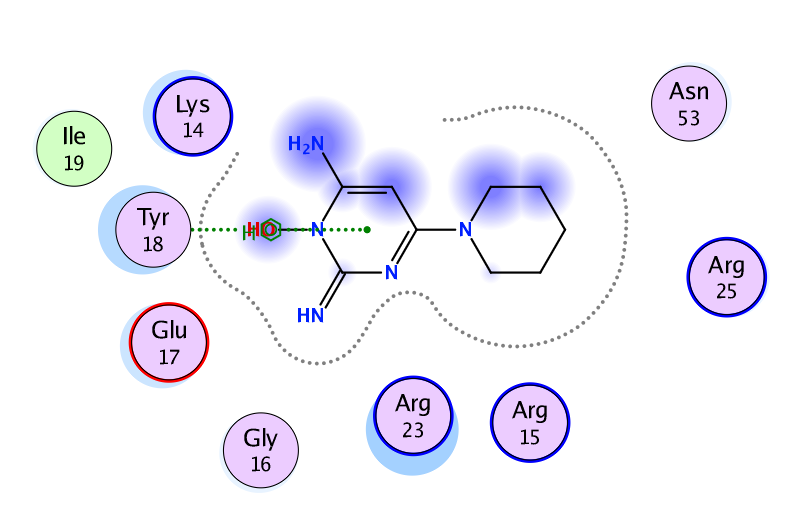

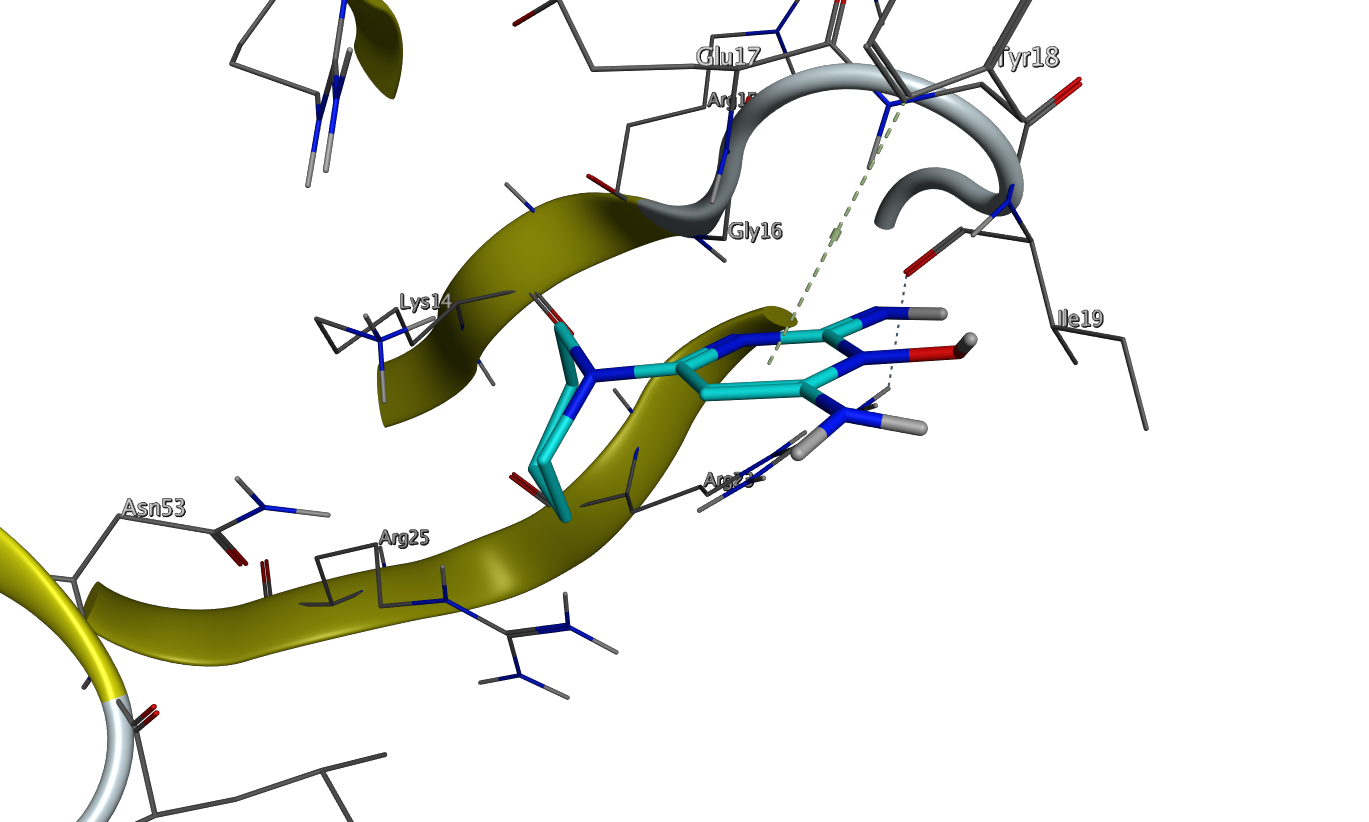


SP1-1sp1 -6.74352026


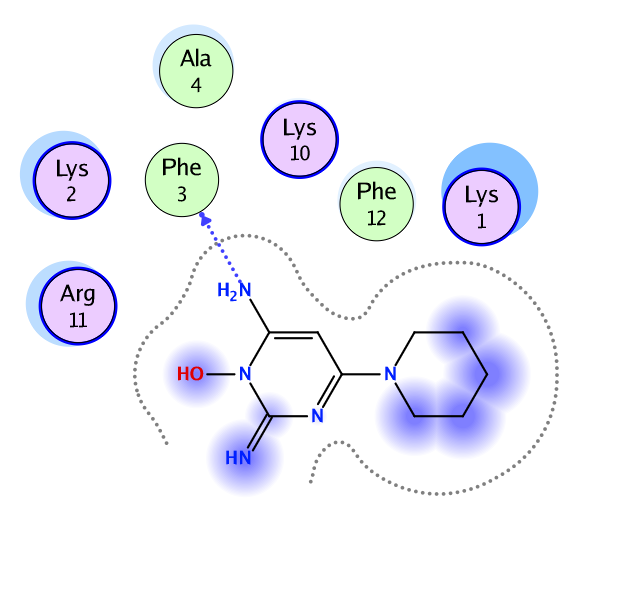

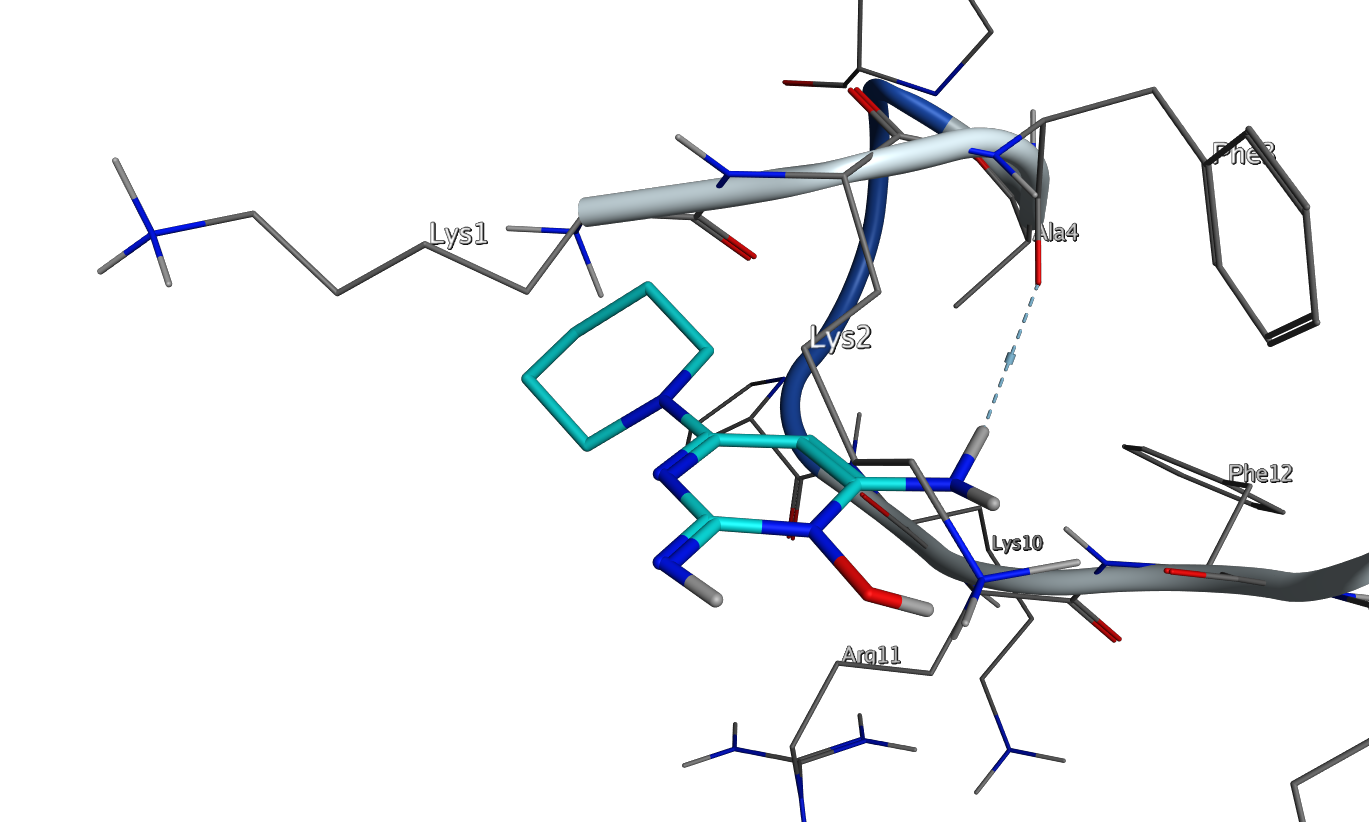


SHC1-1n3h -18.6565571


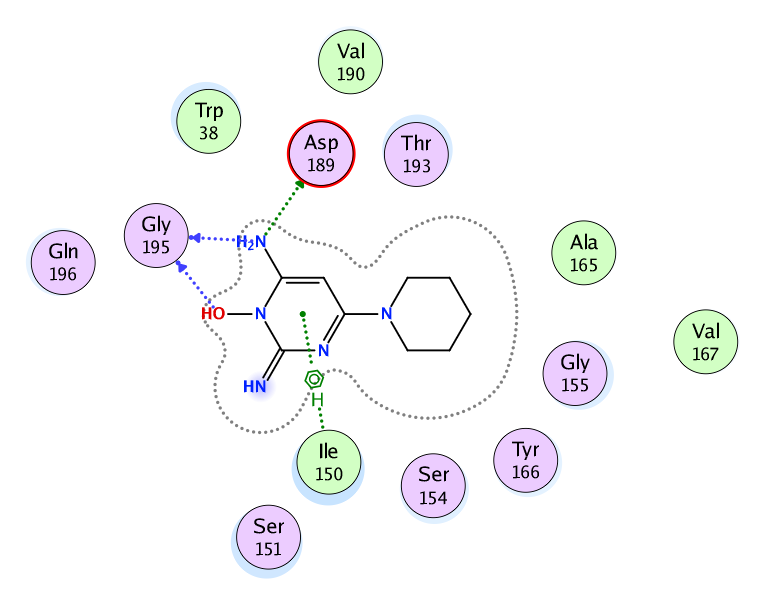

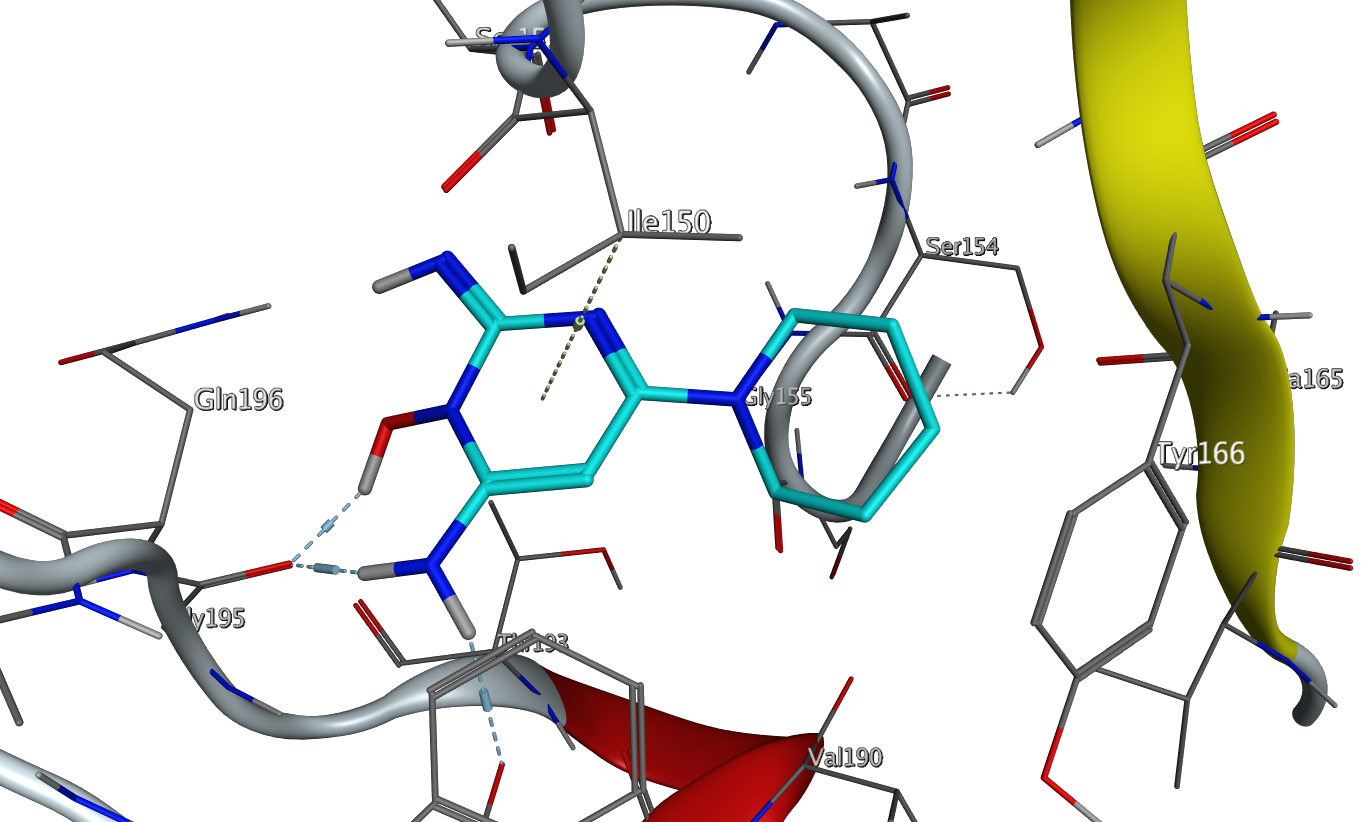


NR3C1-1m2z -19.1638546


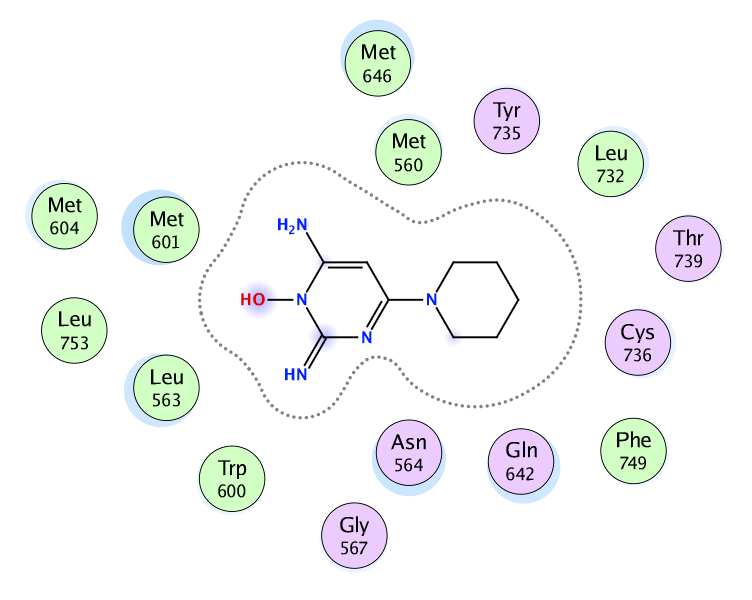

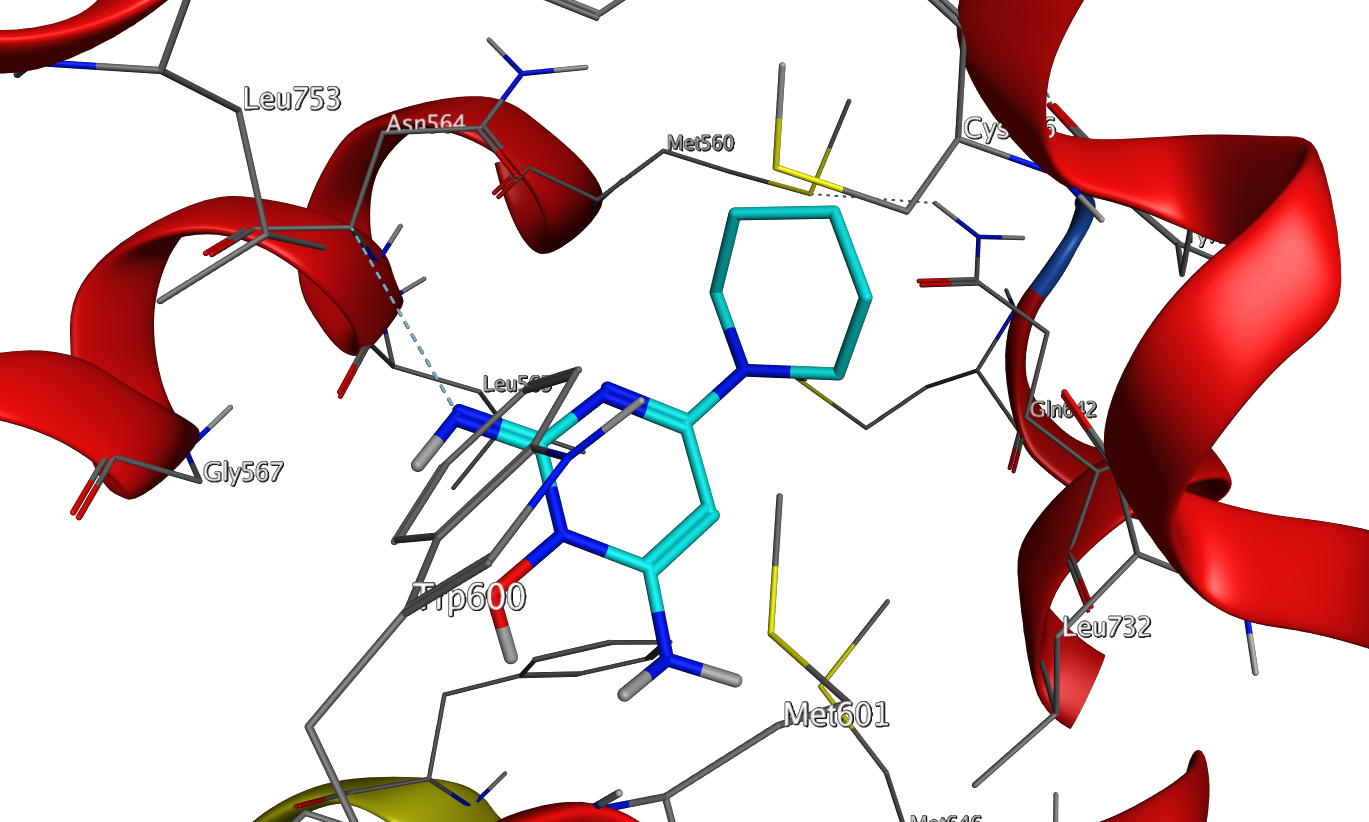


IQGAP1-2rr8 -7.12929153


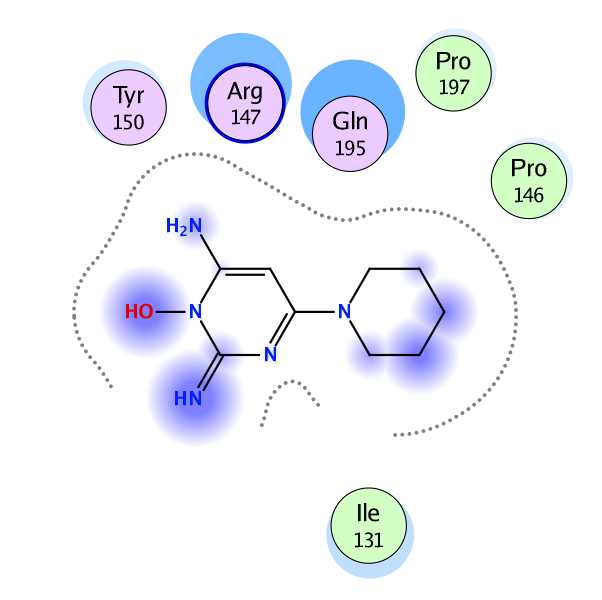

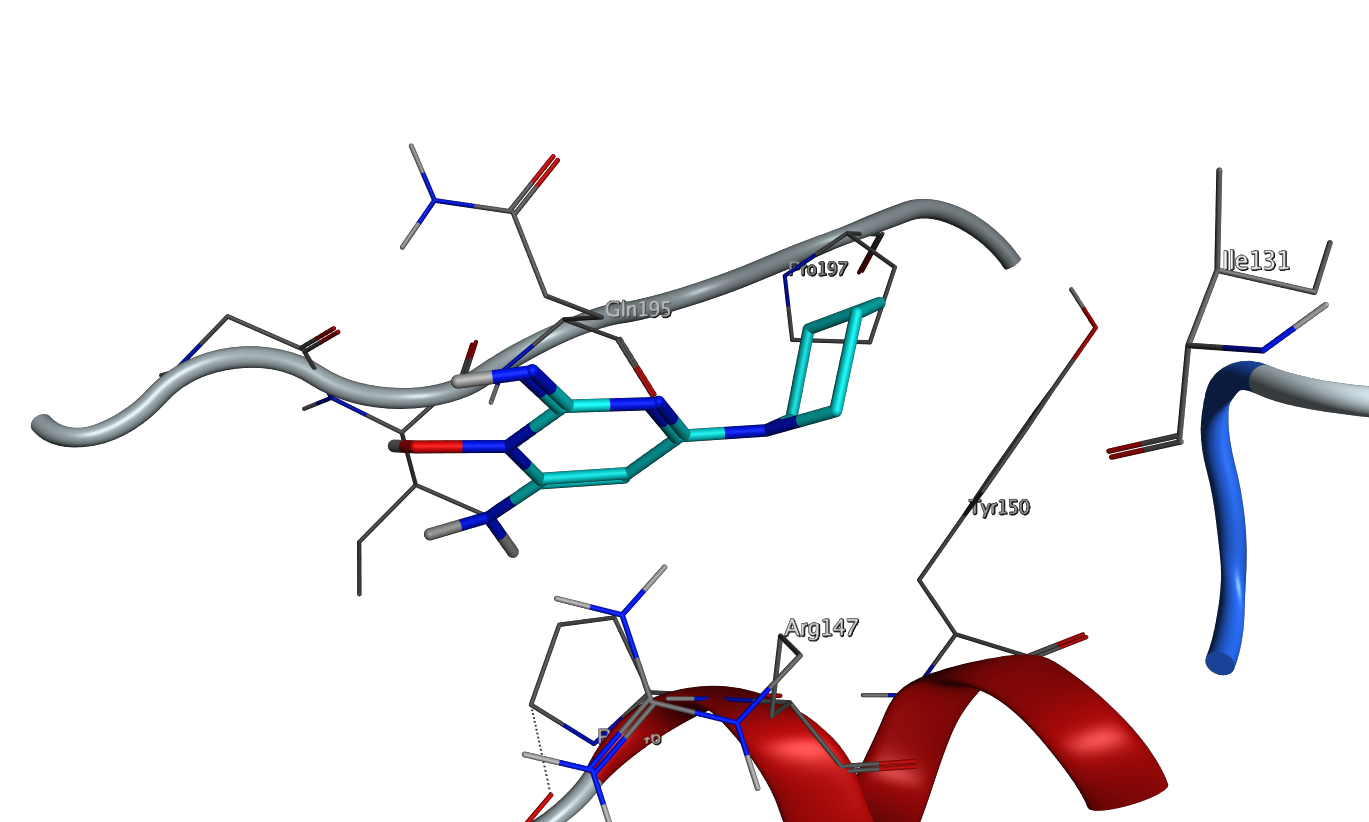


HIF1A-1l3e -2.93022037


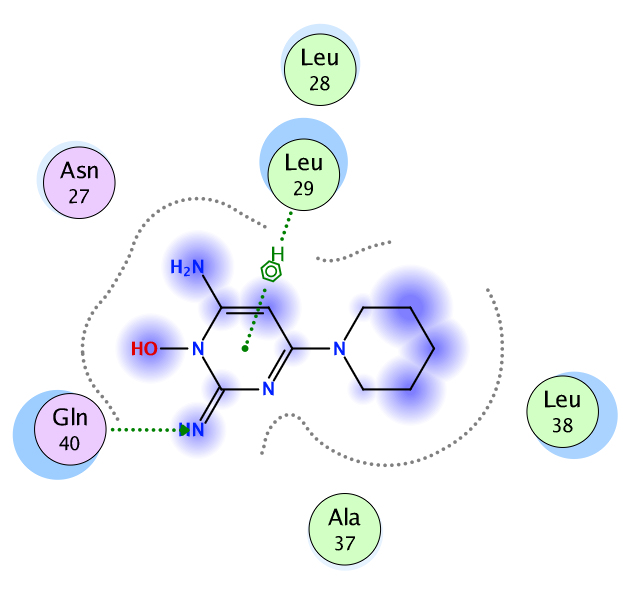

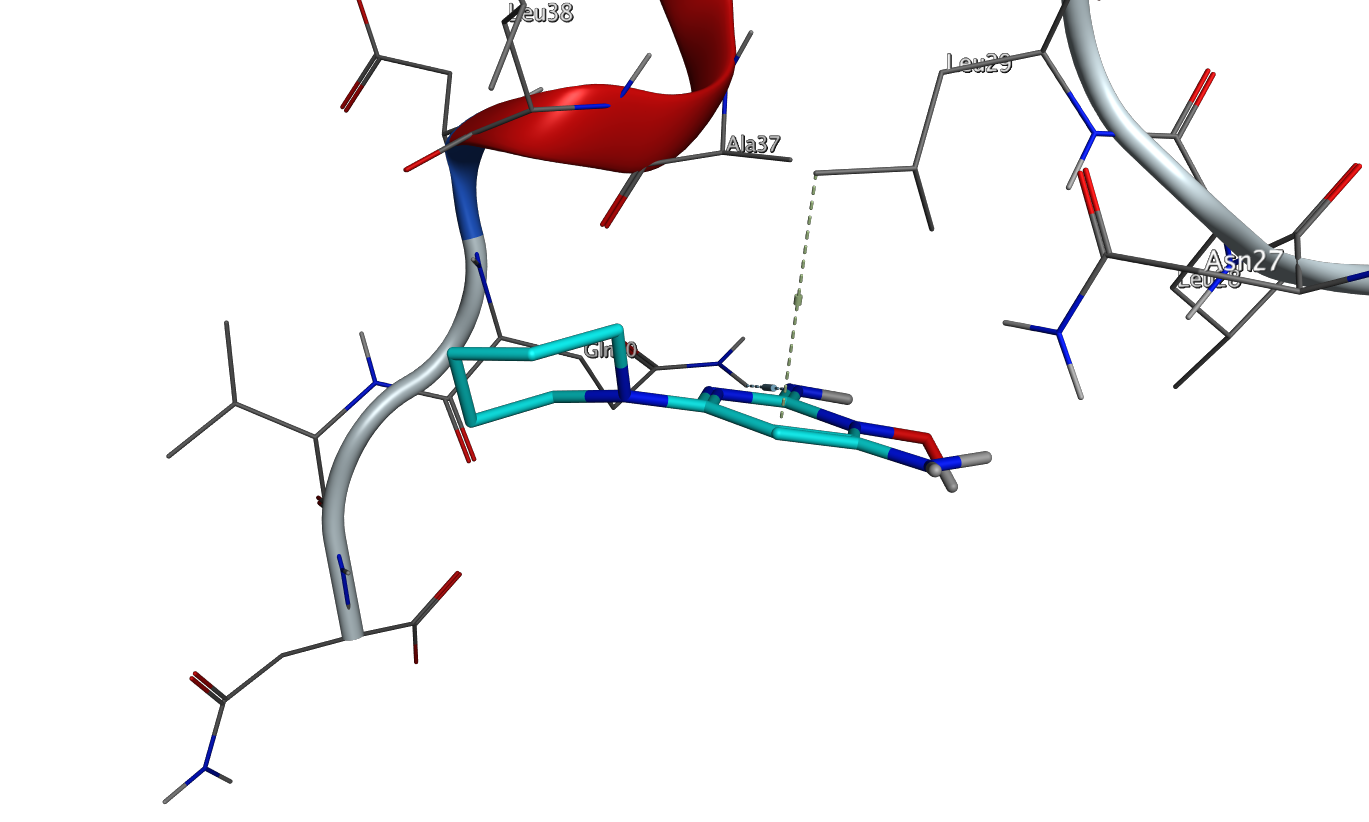

Supplement: Supplementary file 1 [file get_supplementary_file.php]
